# Supplementary material for: Plectin-mediated cytoskeletal crosstalk as a target for inhibition of hepatocellular carcinoma growth and metastasis
Source: eLife journal article supplement (doi:10.7554/elife.102205), 2024-10-16

Figure 1H

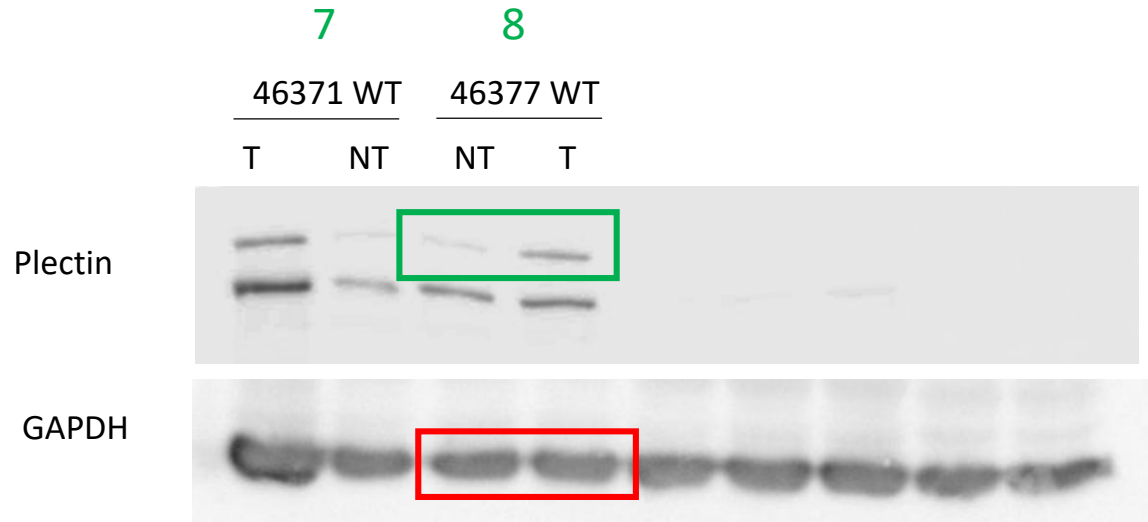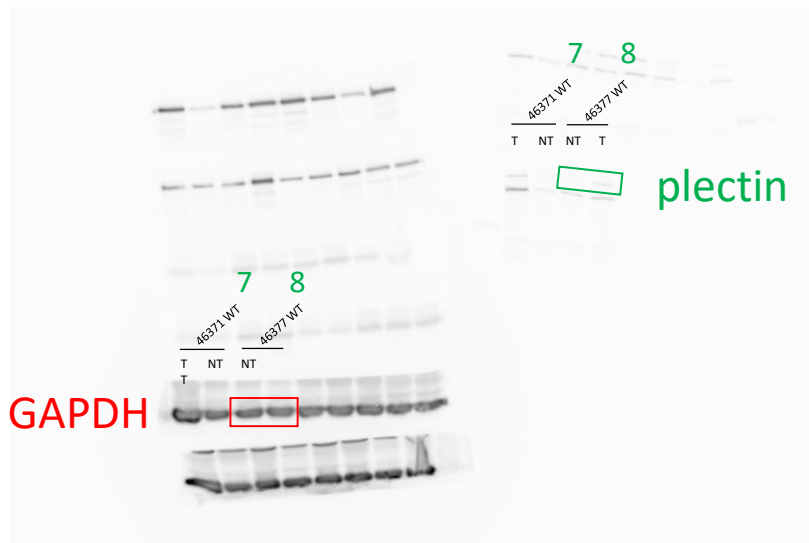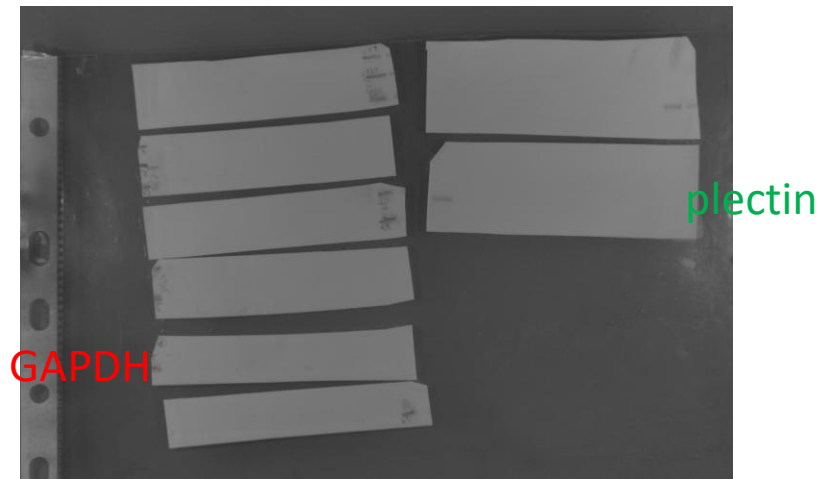

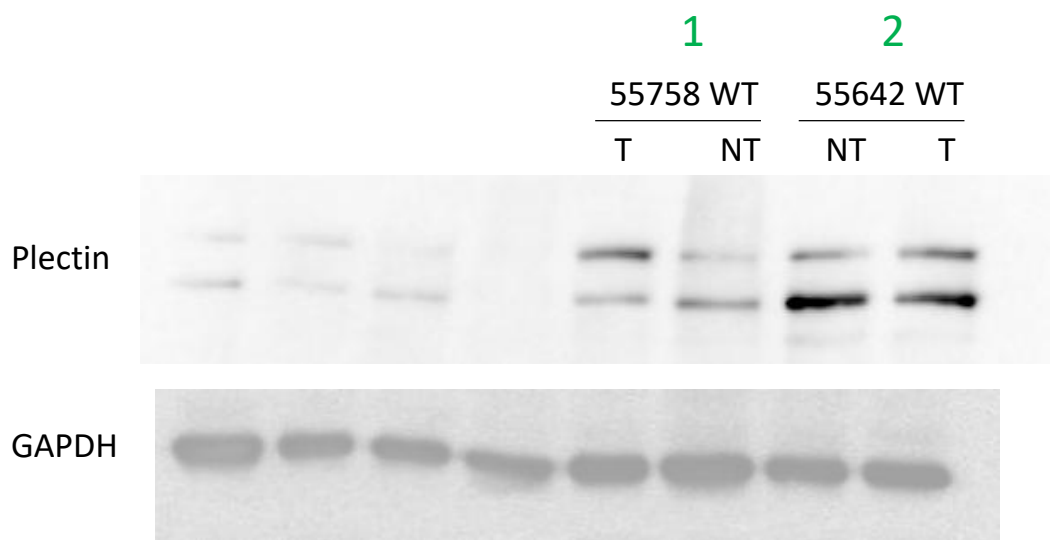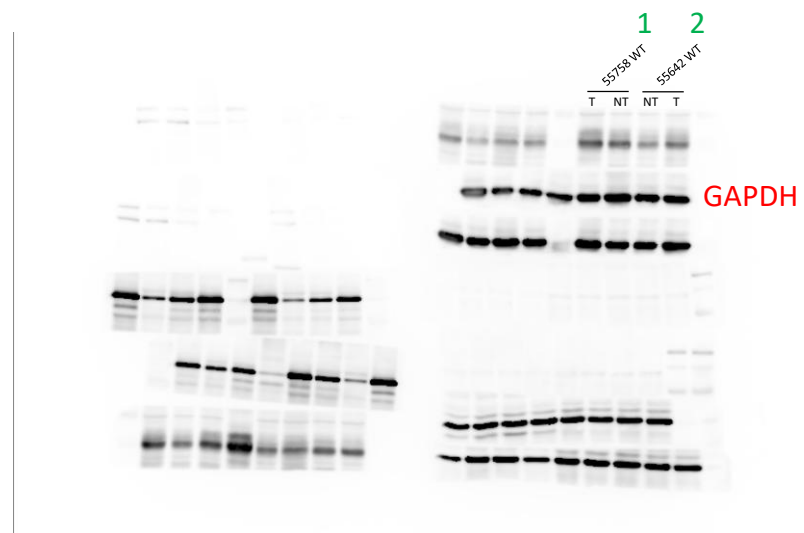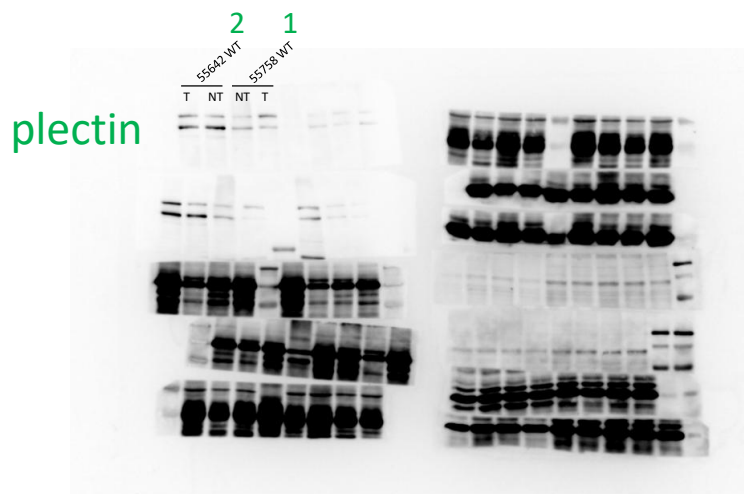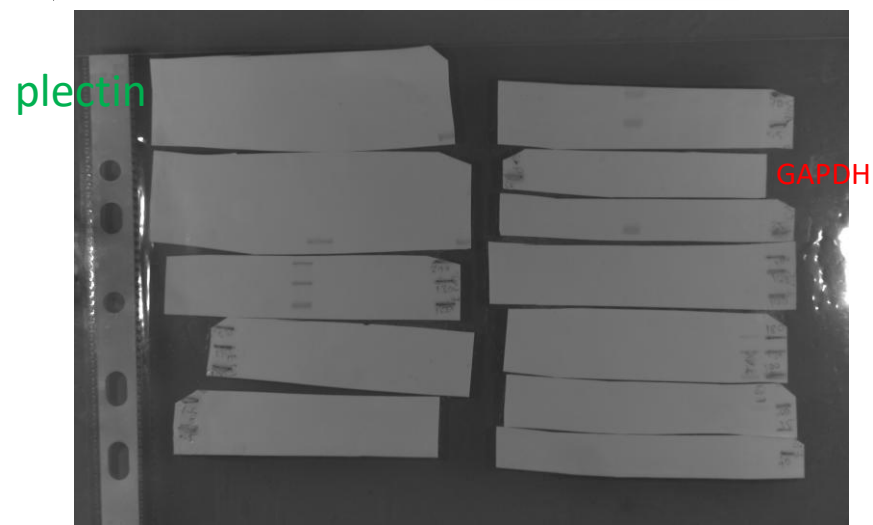

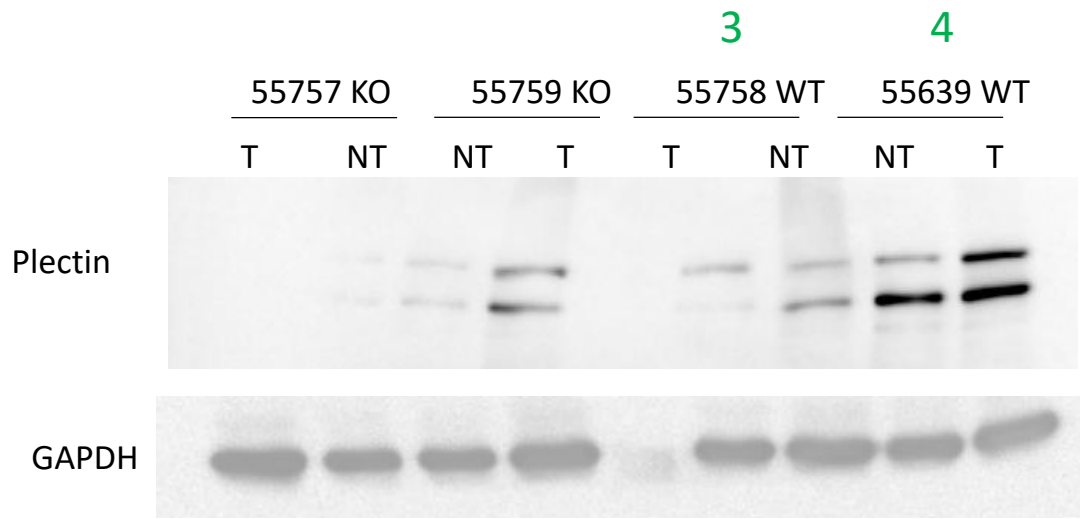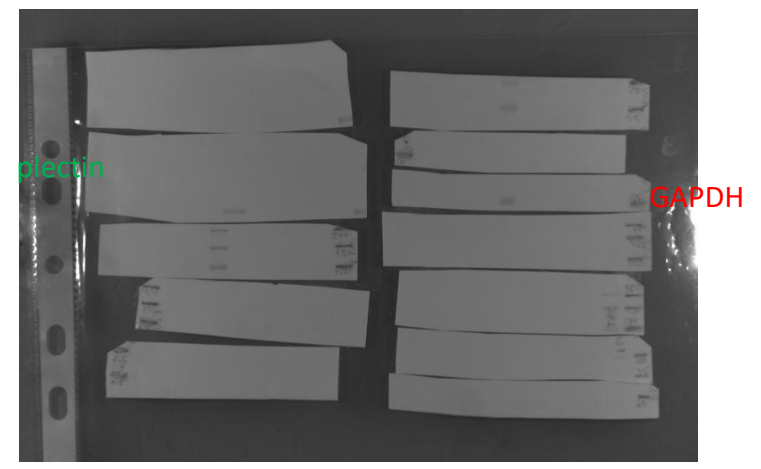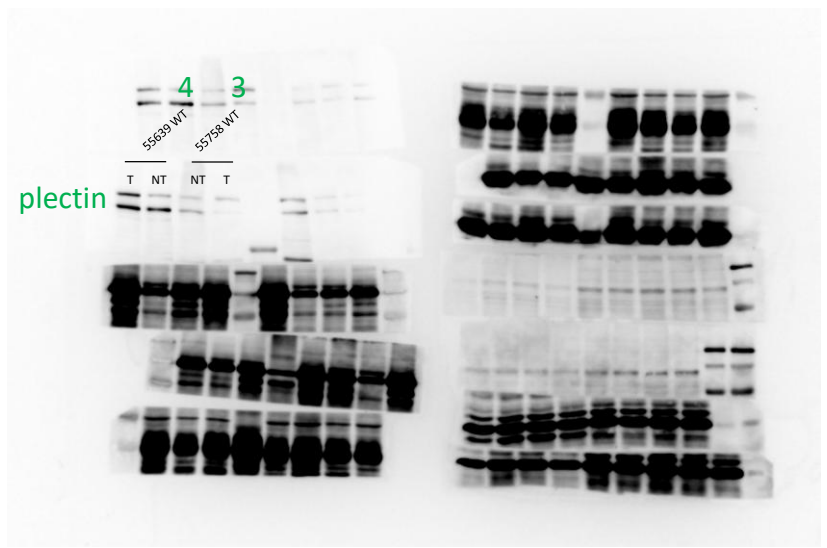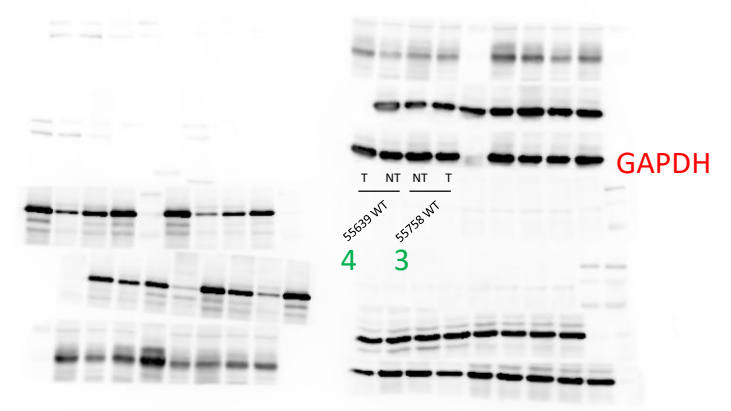

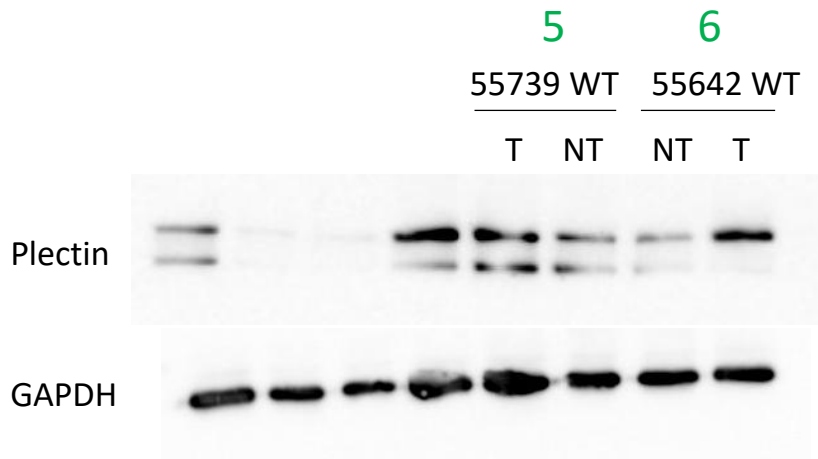

reprobed (see subfolder „reprobe“)

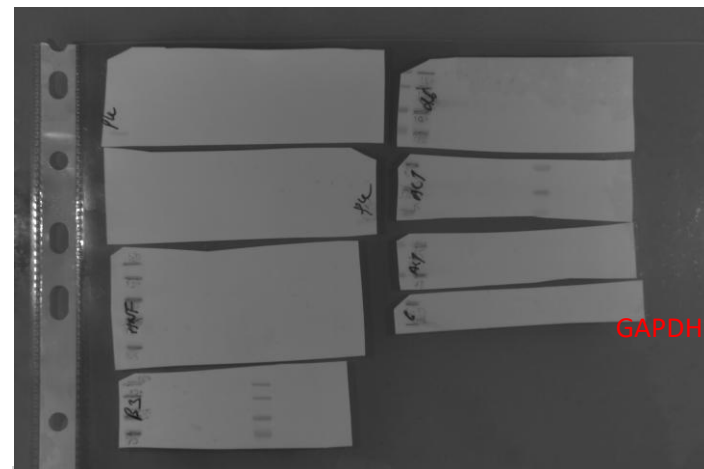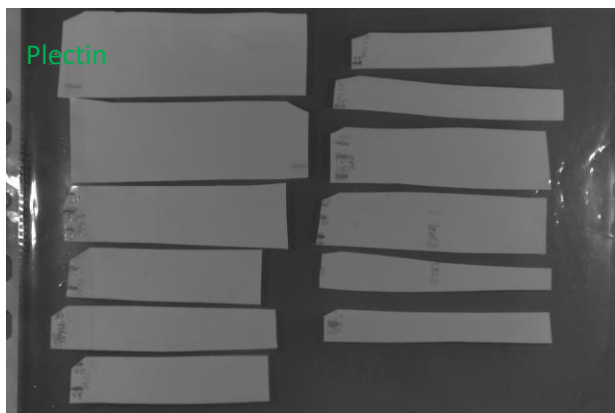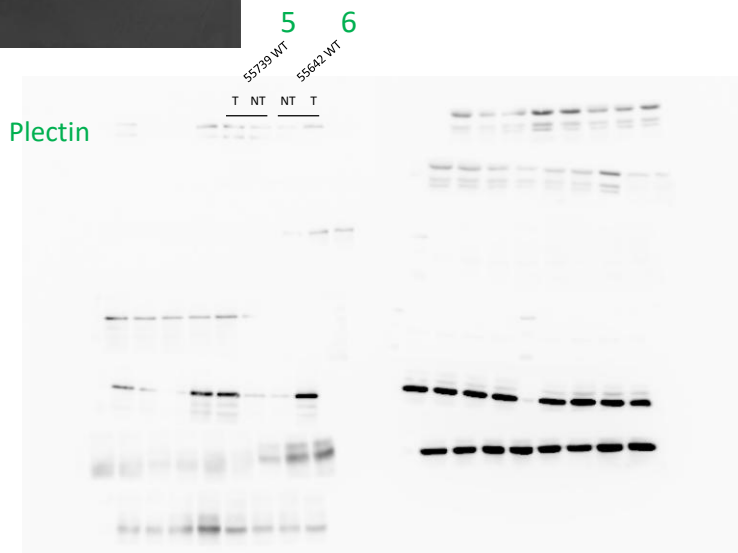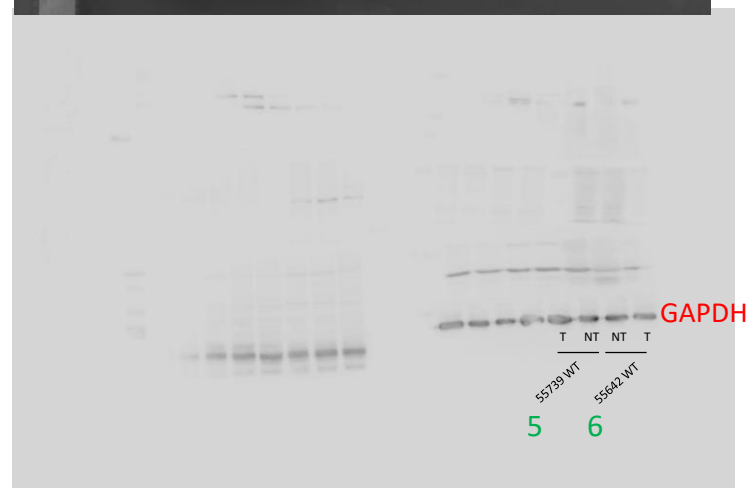

Supplement: fig1-data3 [file elife-102205-fig1-data3-v1.pdf]
