# Supplementary material for: Plectin-mediated cytoskeletal crosstalk as a target for inhibition of hepatocellular carcinoma growth and metastasis
Source: eLife journal article supplement (doi:10.7554/elife.102205), 2024-10-16

# SNU-475 replicate 1 (221209)

Figure 3D

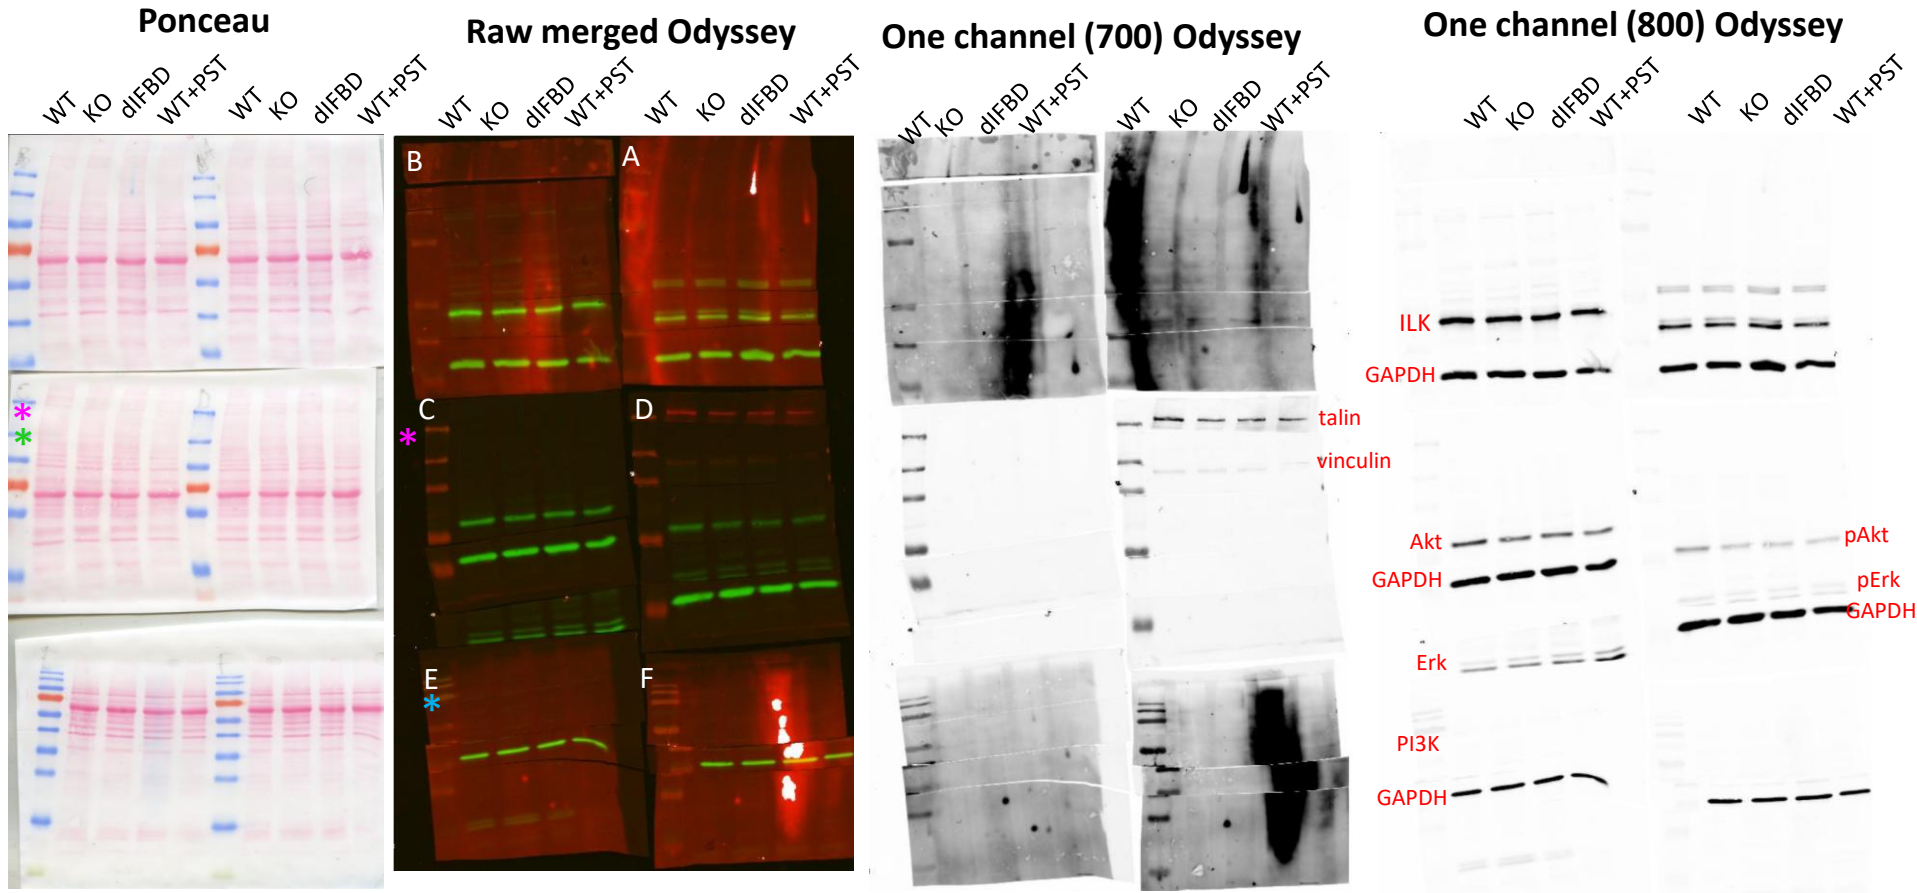

\* pFAK (rabbit 800) and FAK (mouse 700) remained on membrane C (file 230105)

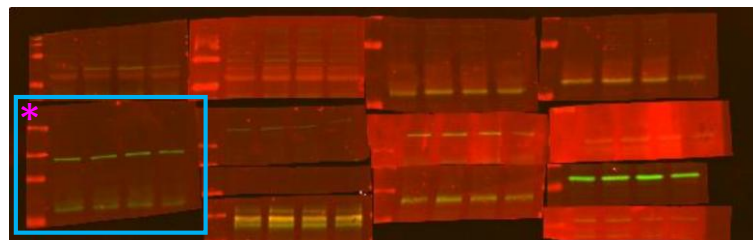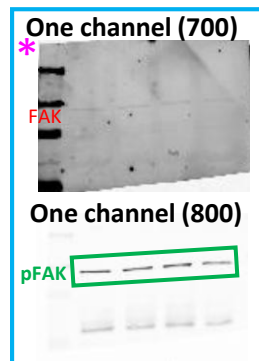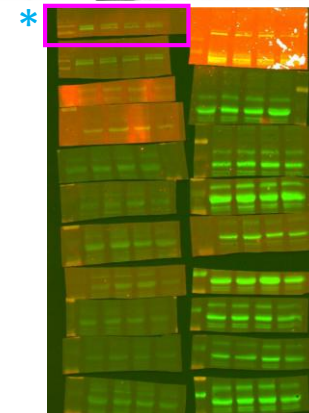

\* Integrin b1 stained on membrane E (file 230310)

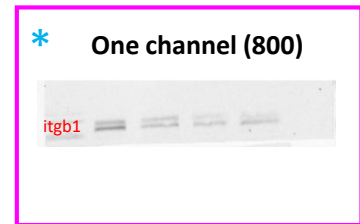

# SNU-475 replicate 2 and 3 (221216)

Figure 3D

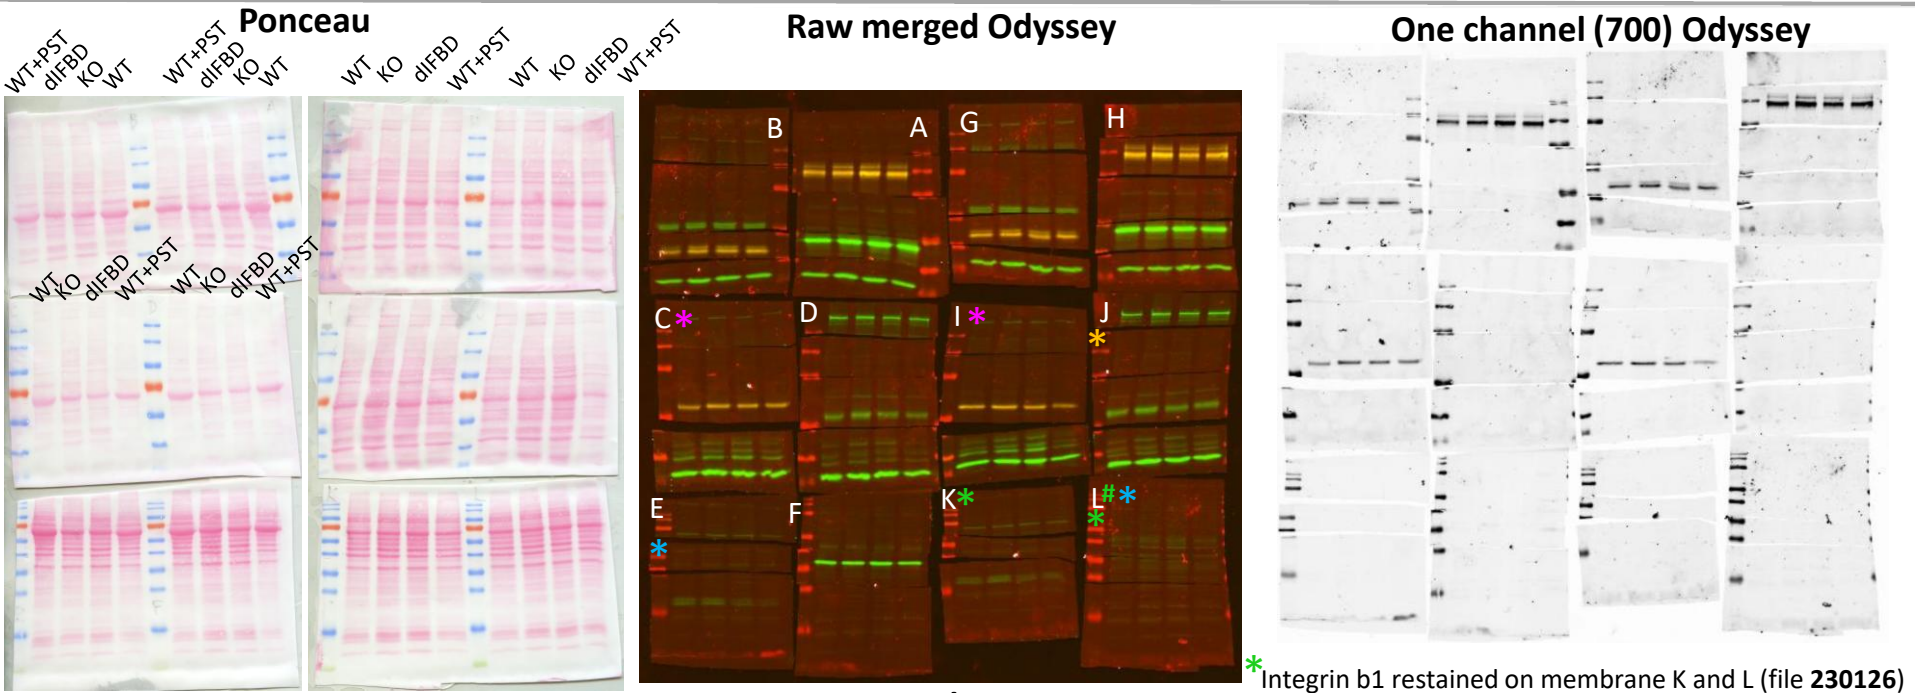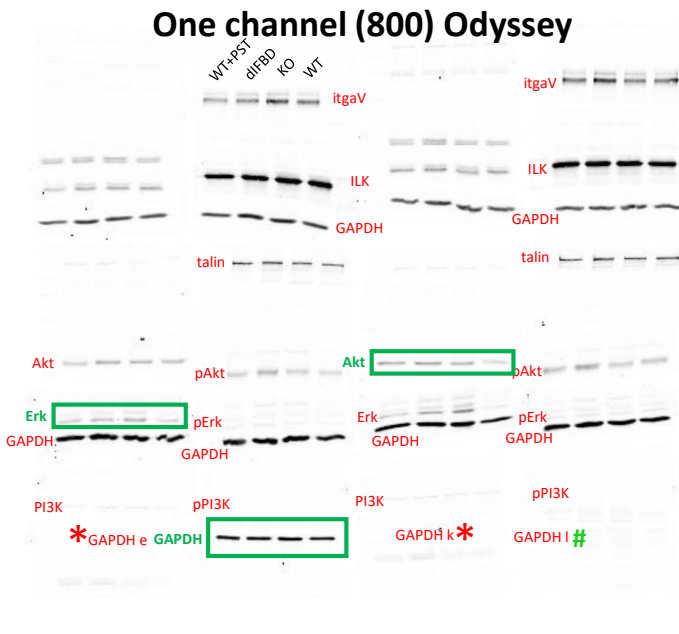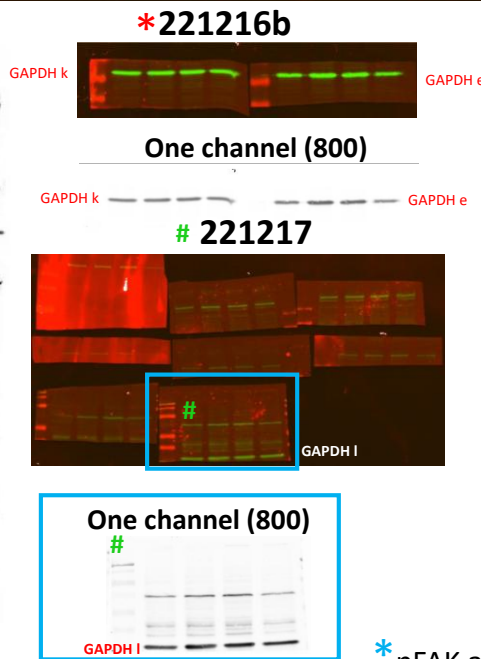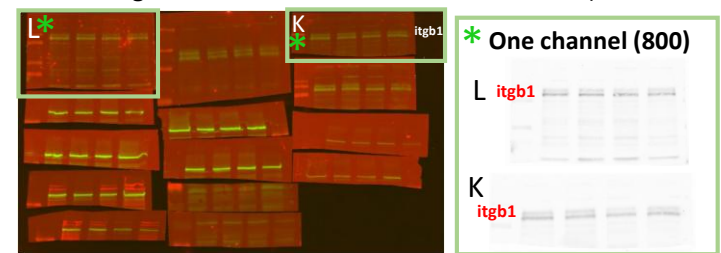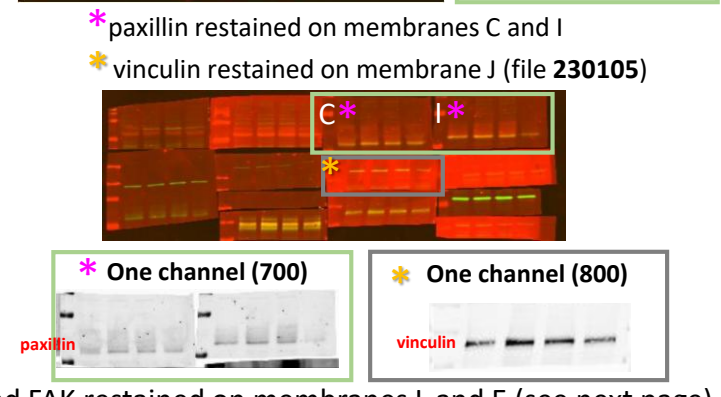

# SNU-475 replicate 4 and 5 (221221)

Ponseau

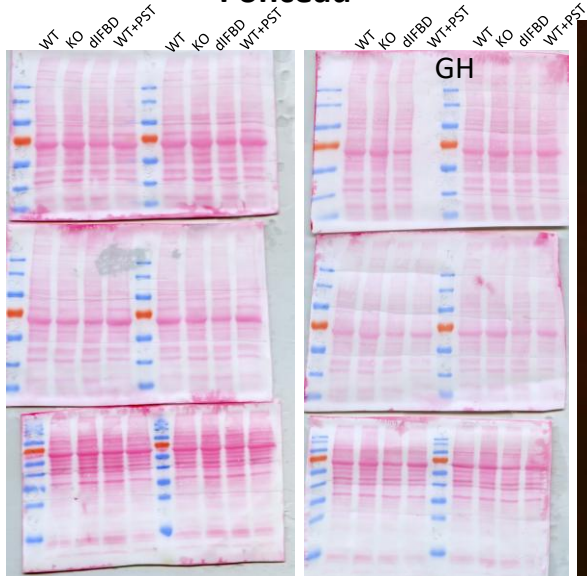

Raw merged Odyssey

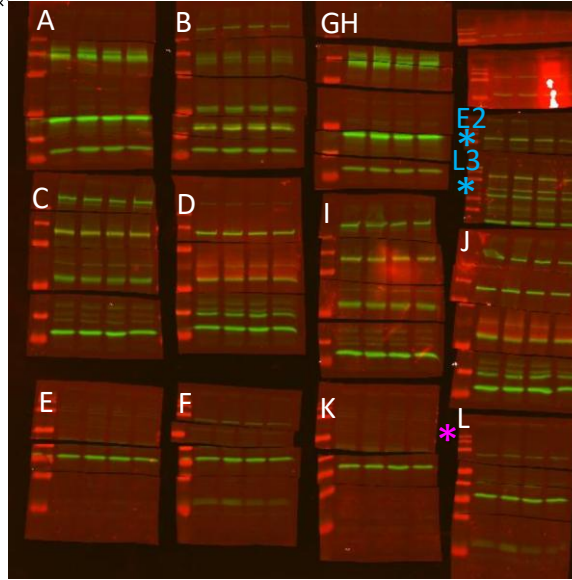

One channel (700) Odyssey

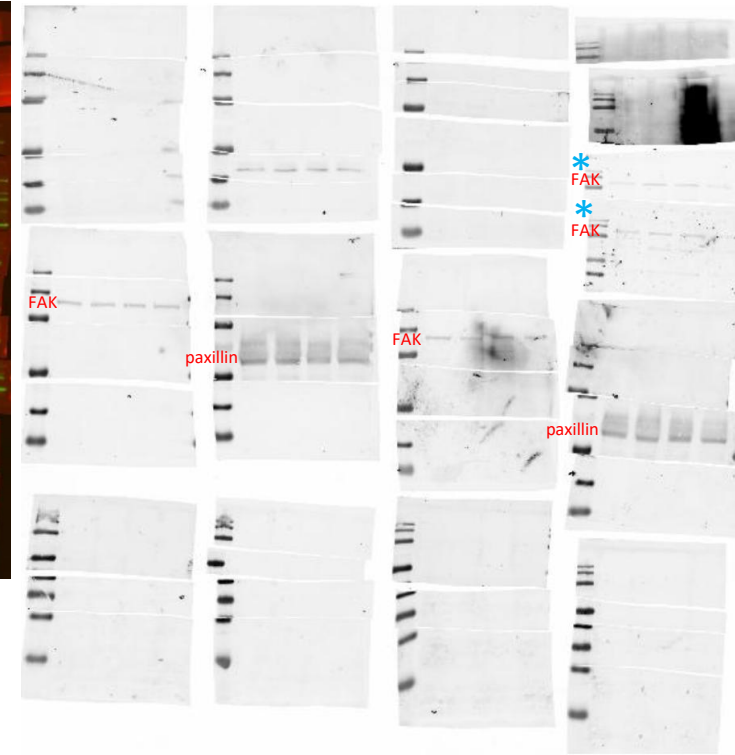

One channel (800) Odyssey

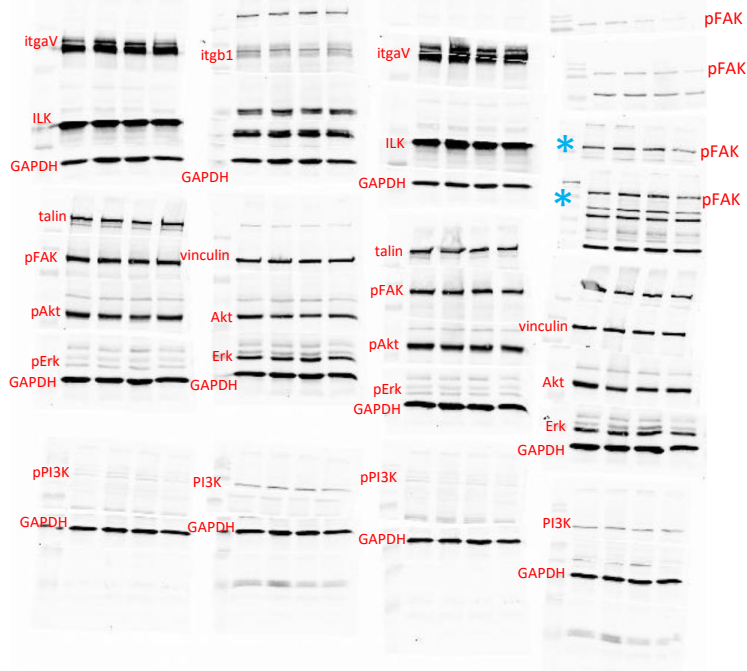

\* Integrin b1 of 5th replicate stained on membrane L (file 230126)

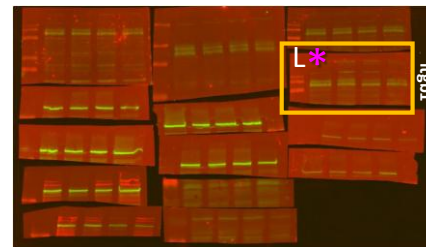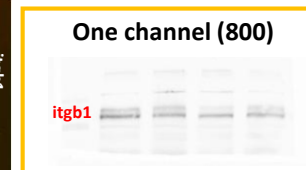

\* pFAK and FAK from 221216 remained on membrane E and L (see \* on previous page).



# SNU-475 replicate 7 and 8 (230224)

Figure 3D

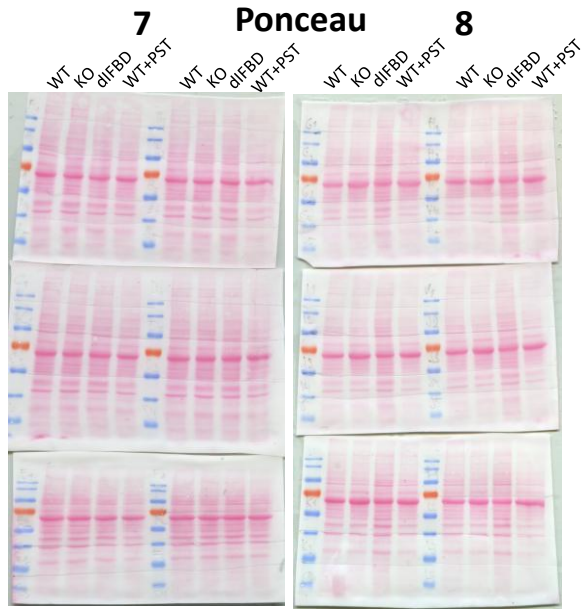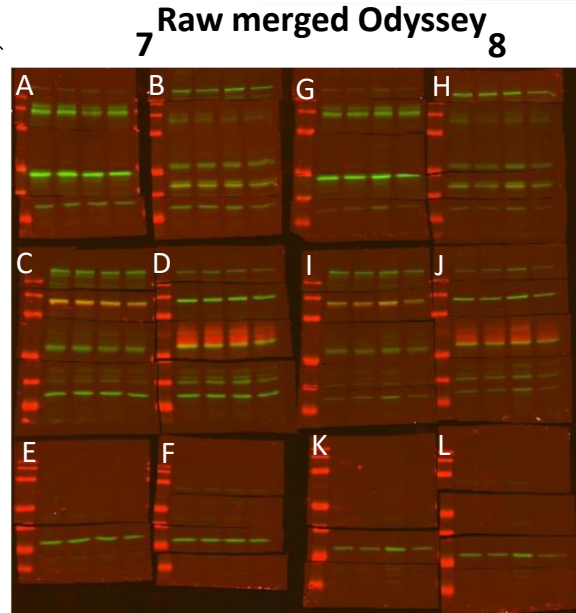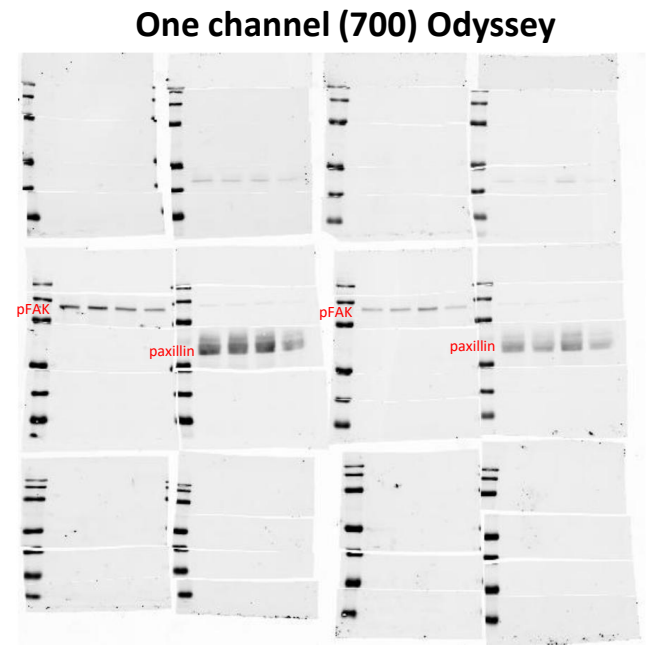

**One channel (800) Odyssey**

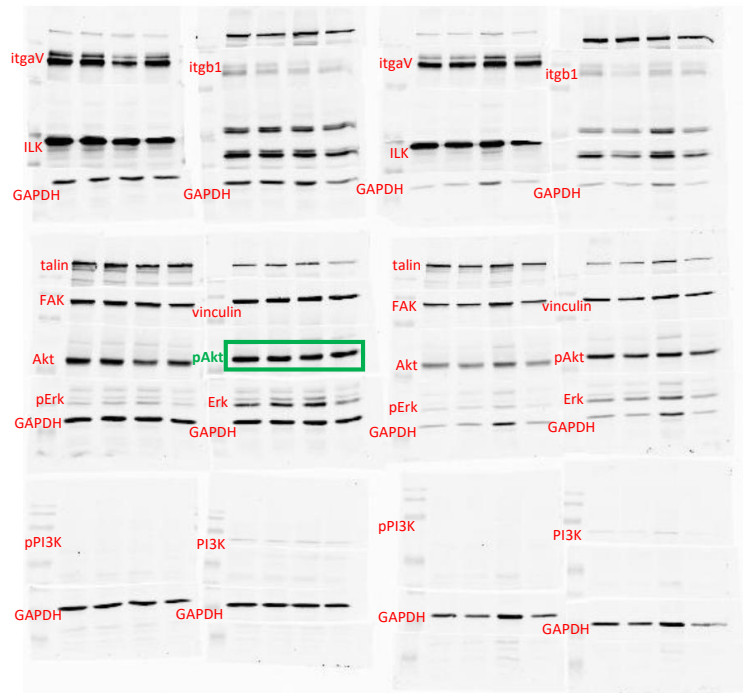

# SNU-475 replicate 9 (230305)

Ponceau

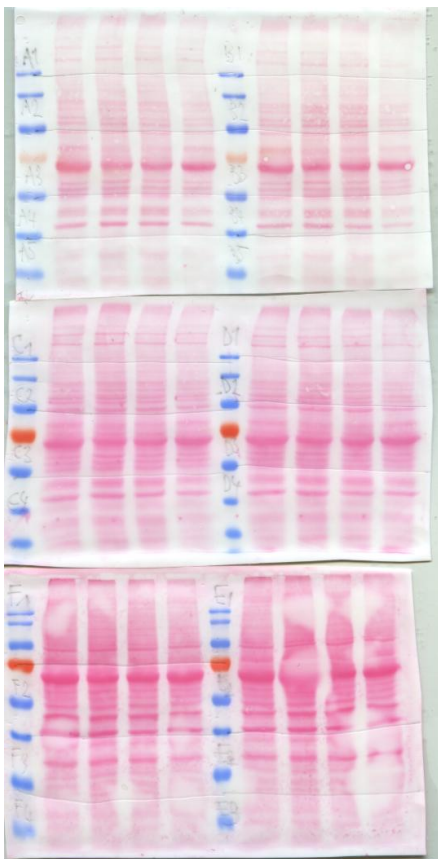

Raw merged Odyssey

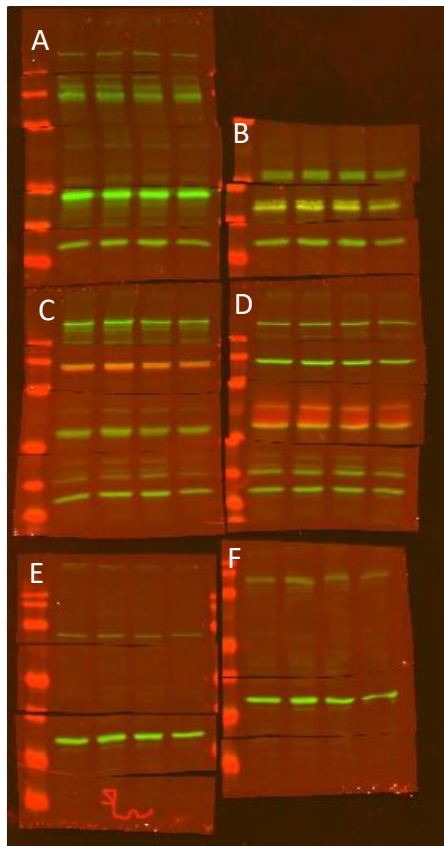

One channel (700) Odyssey

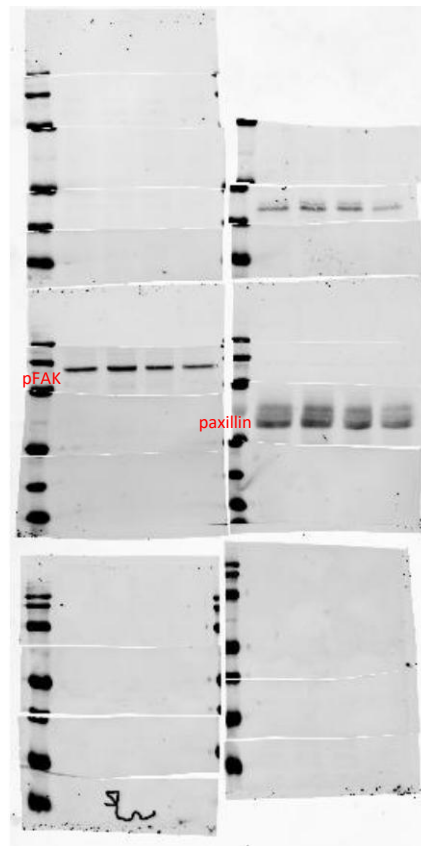

One channel (800) Odyssey

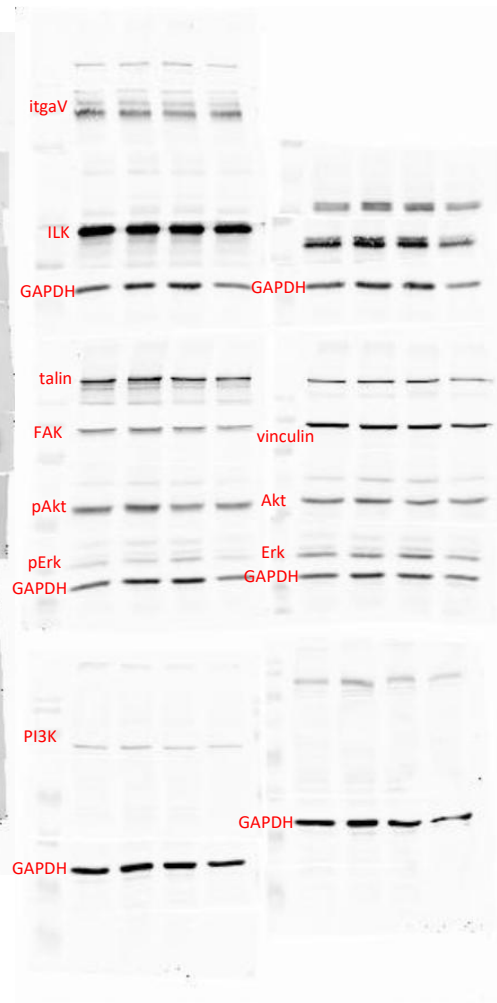

230308

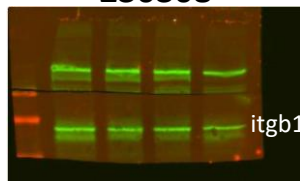

One channel (800) Odyssey

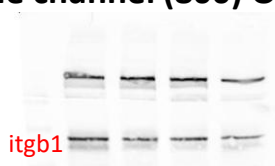

# Huh7 replicate 2 (230113)

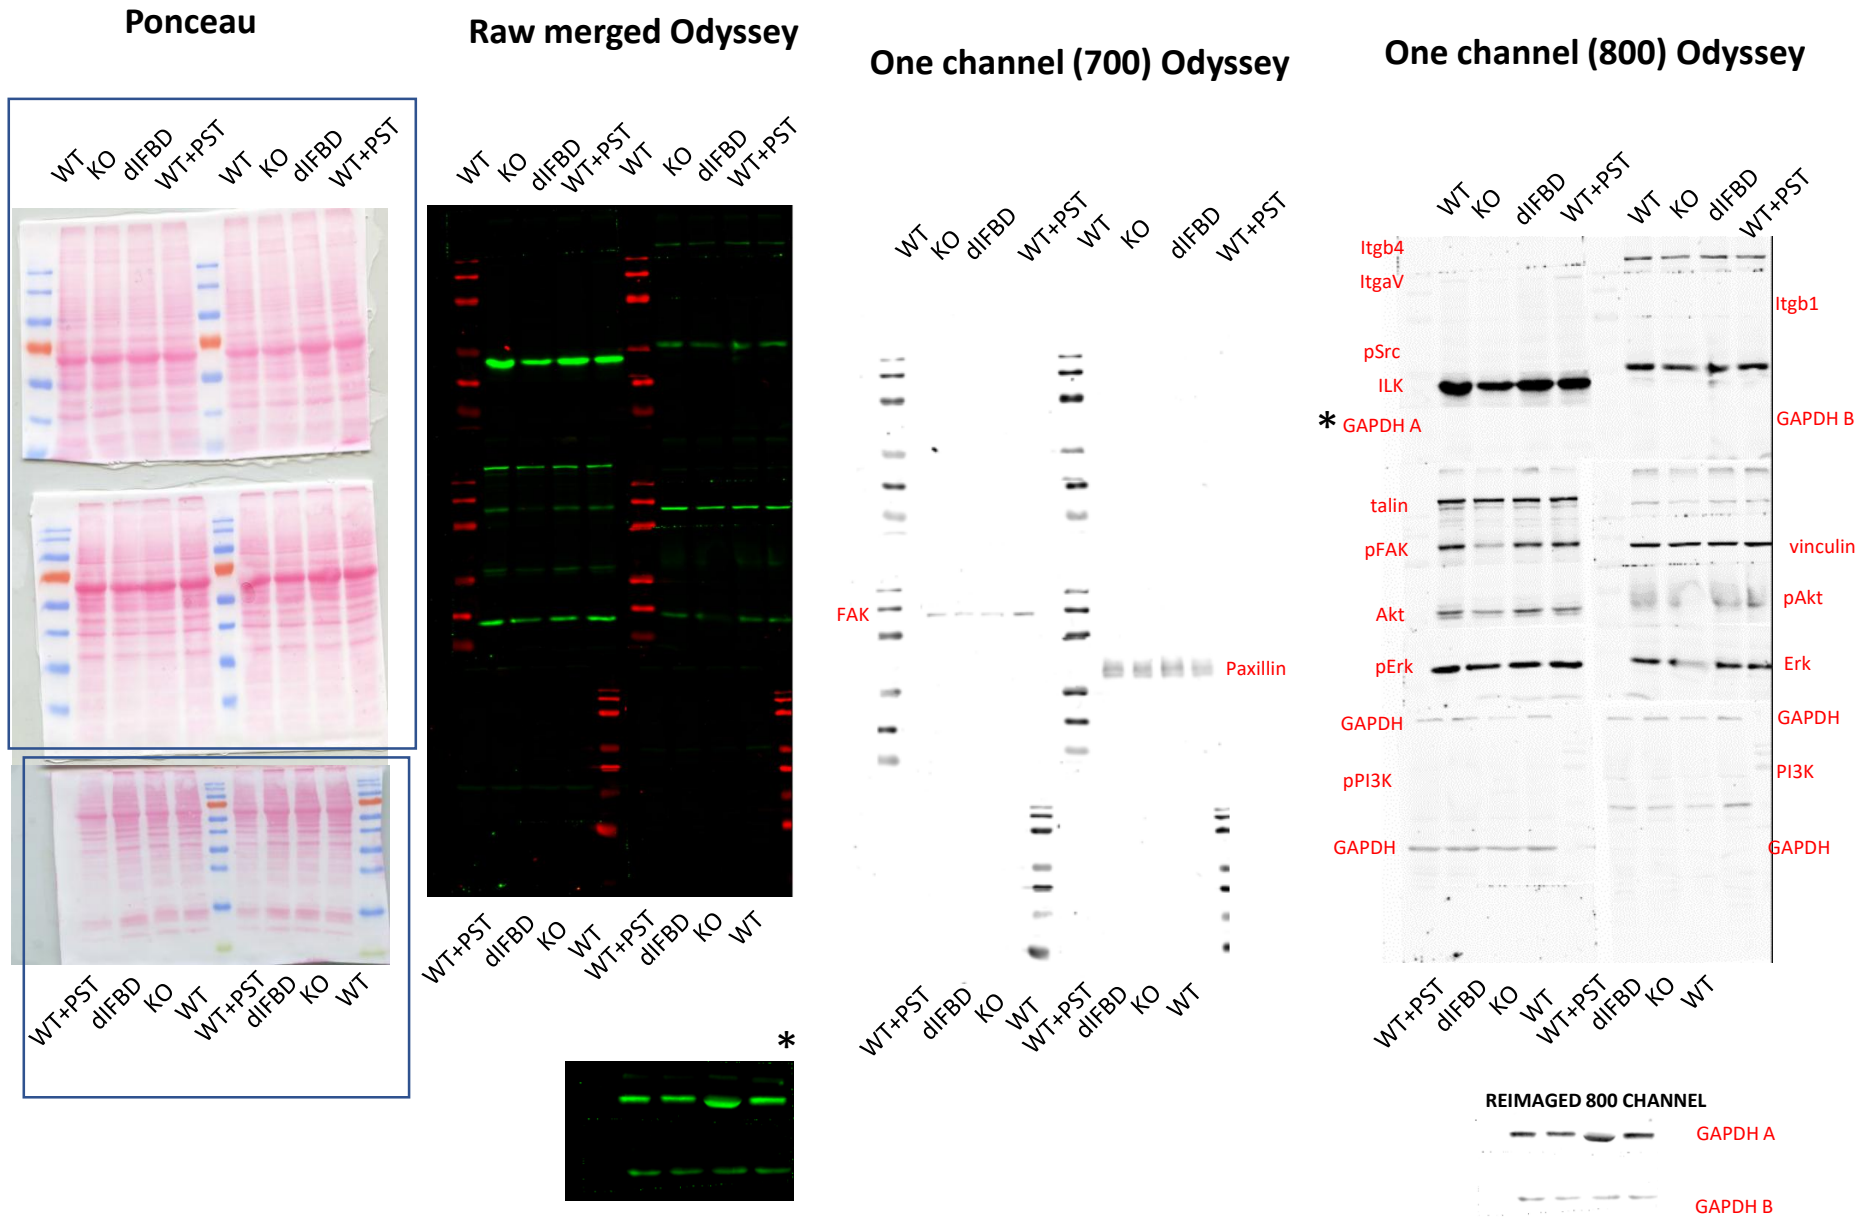

**Ponceau**

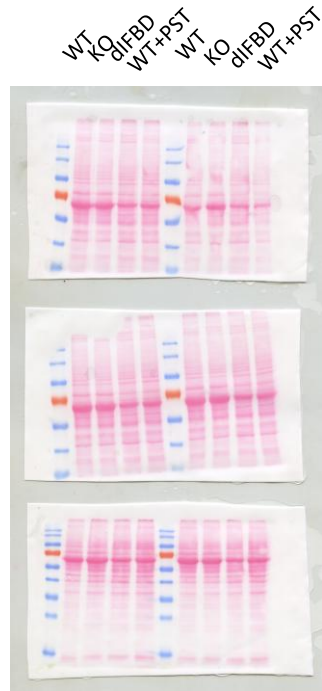

**Raw merged Odyssey**

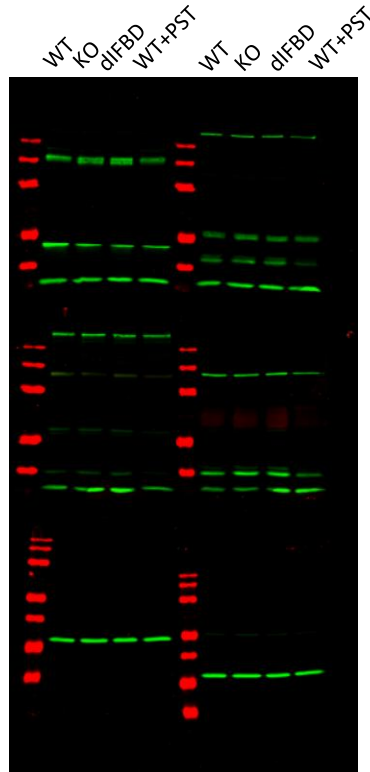

**One channel (700) Odyssey**

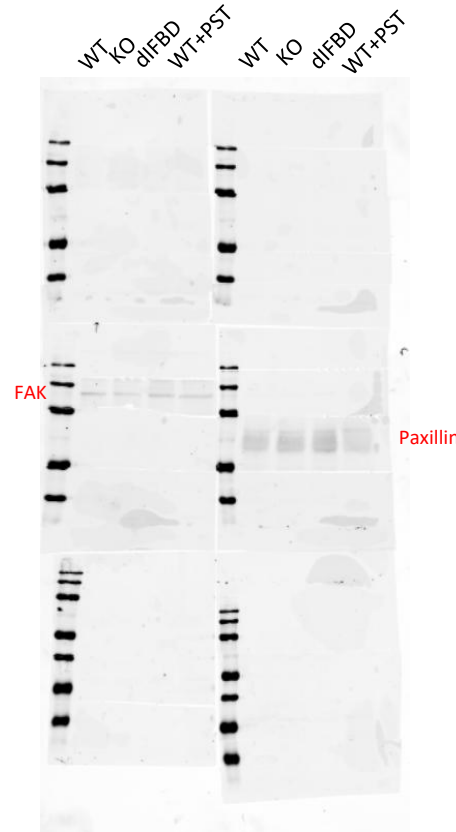

**One channel (800) Odyssey**

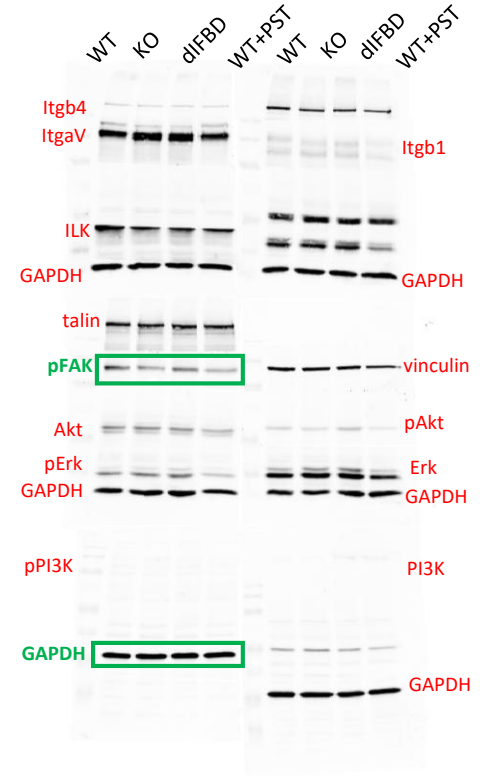



# Huh7 replicate 4 (230120)

Ponceau

Raw merged Odyssey

One channel (700) Odyssey

One channel (800) Odyssey

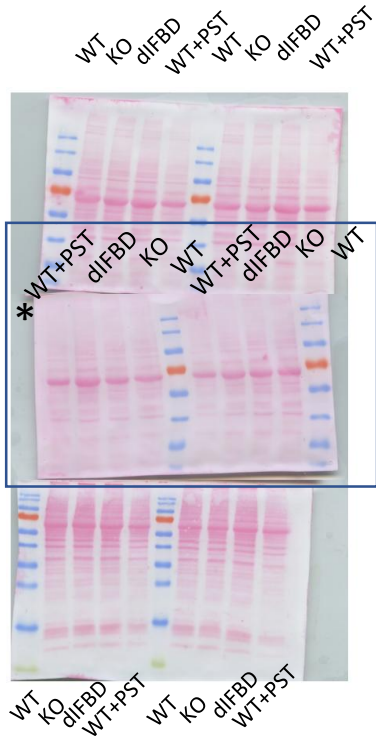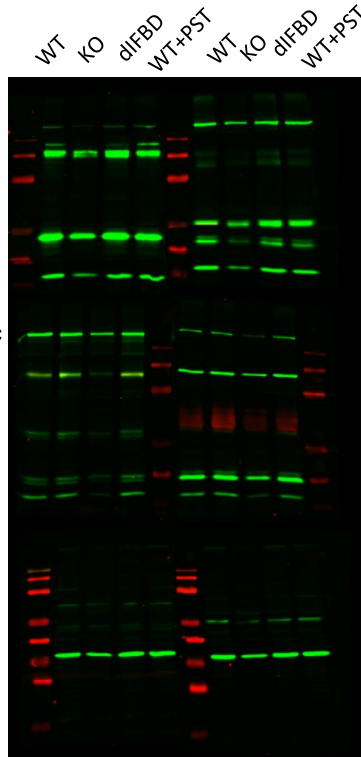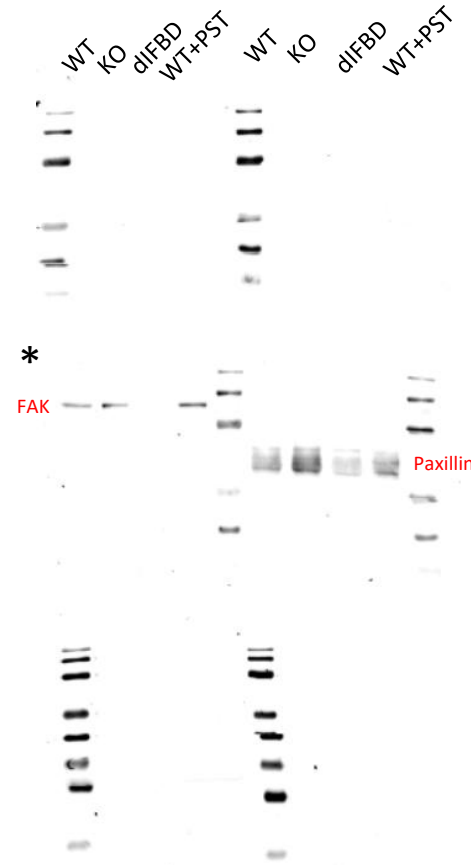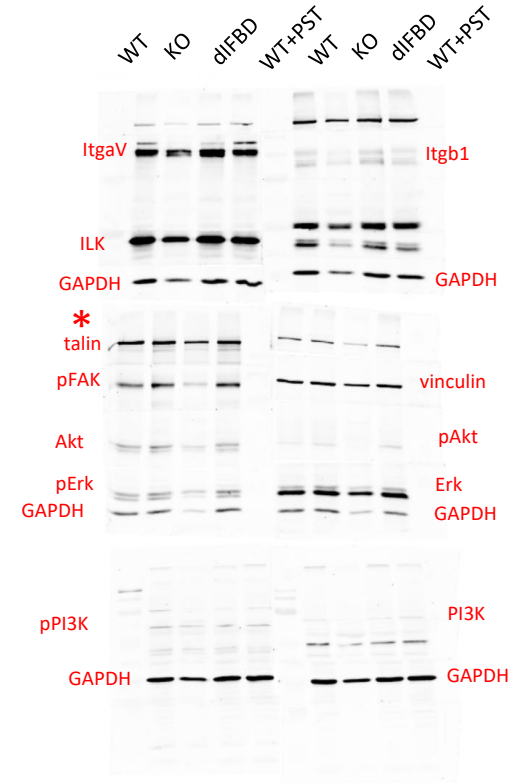

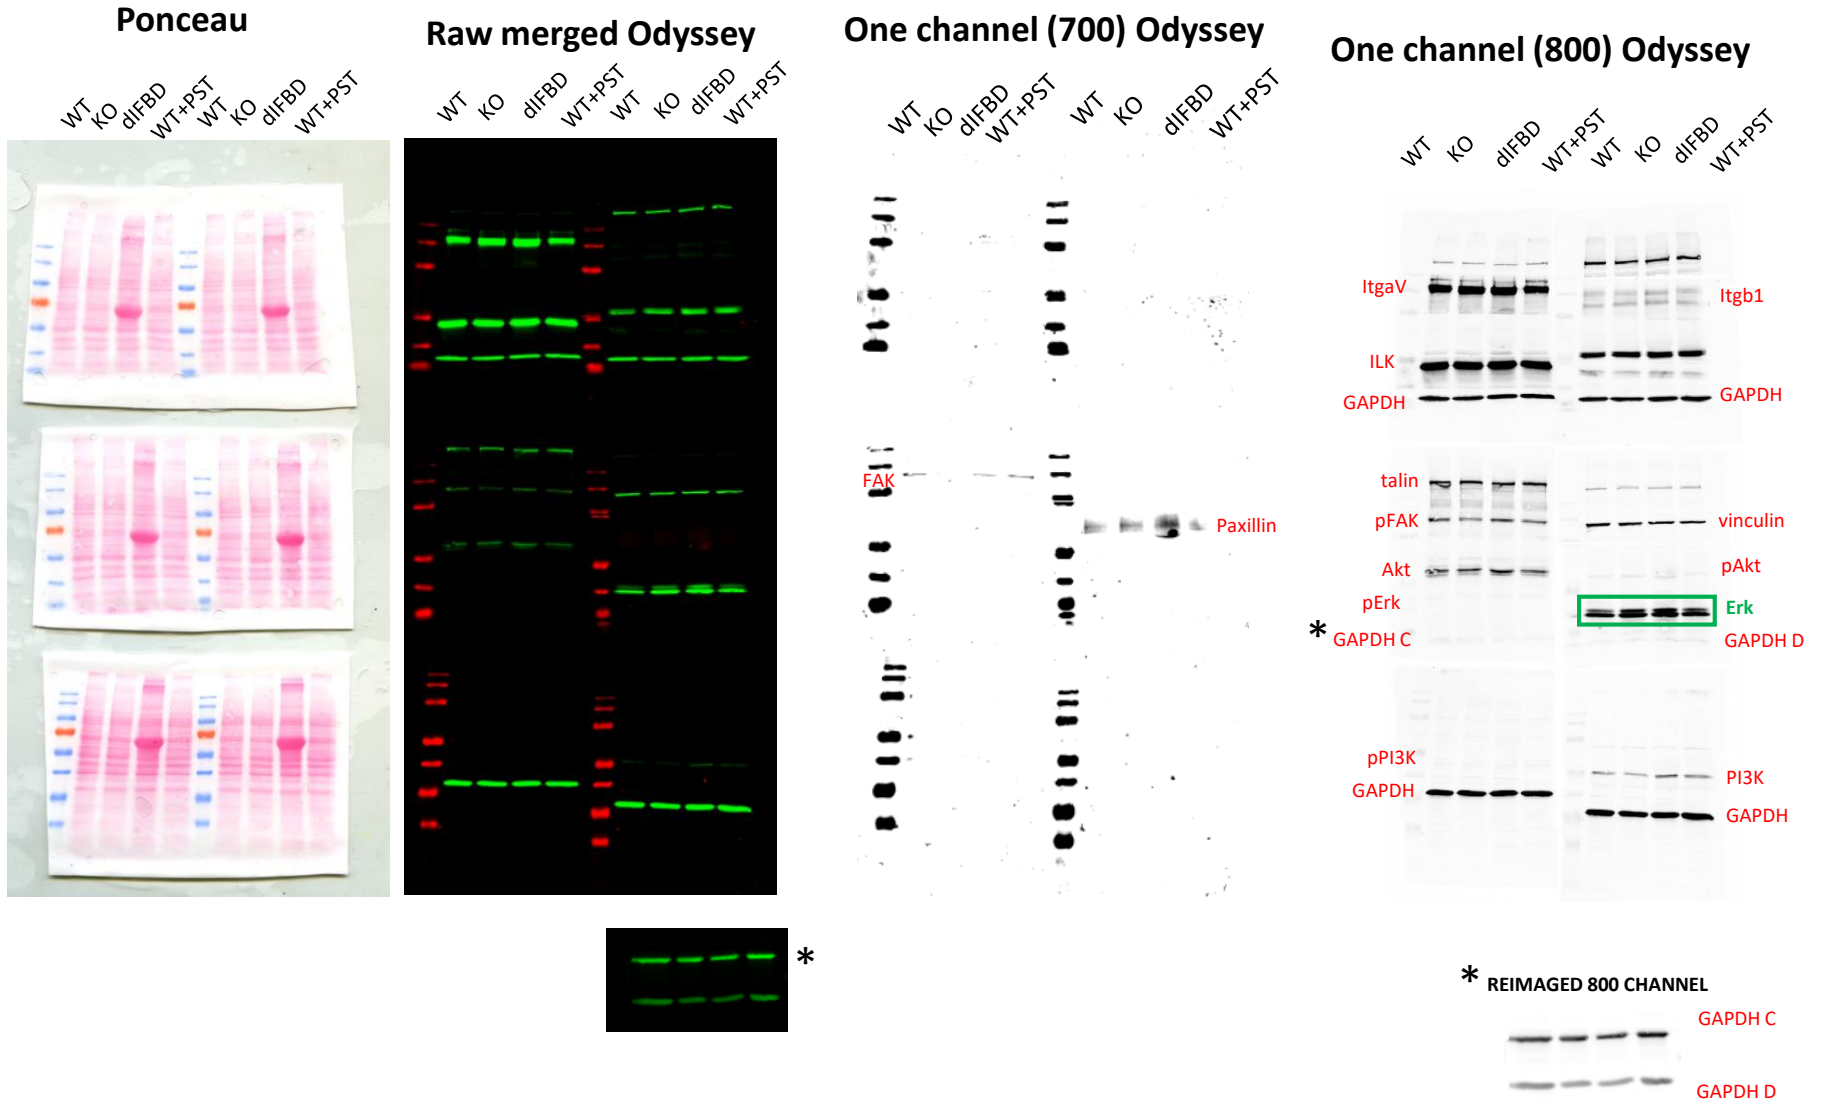

# Huh7 replicate 6 (230301)

**Ponceau**

**Raw merged Odyssey**

**One channel (700) Odyssey**

**One channel (800) Odyssey**

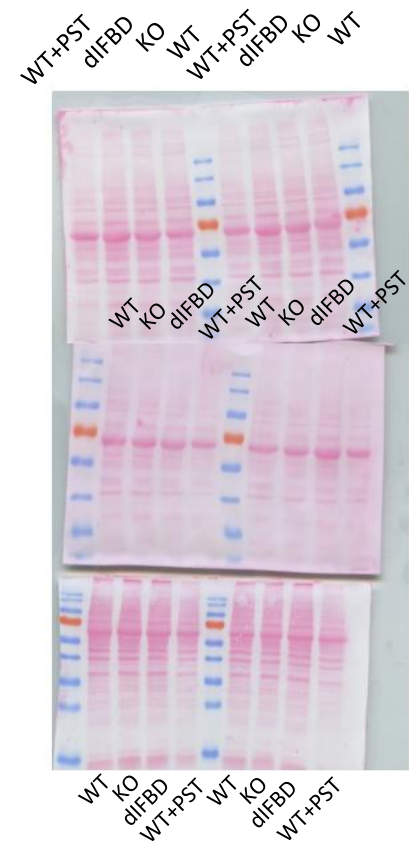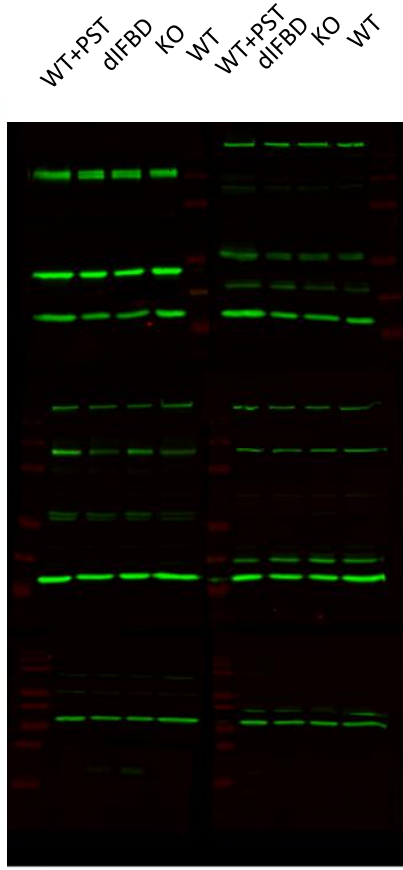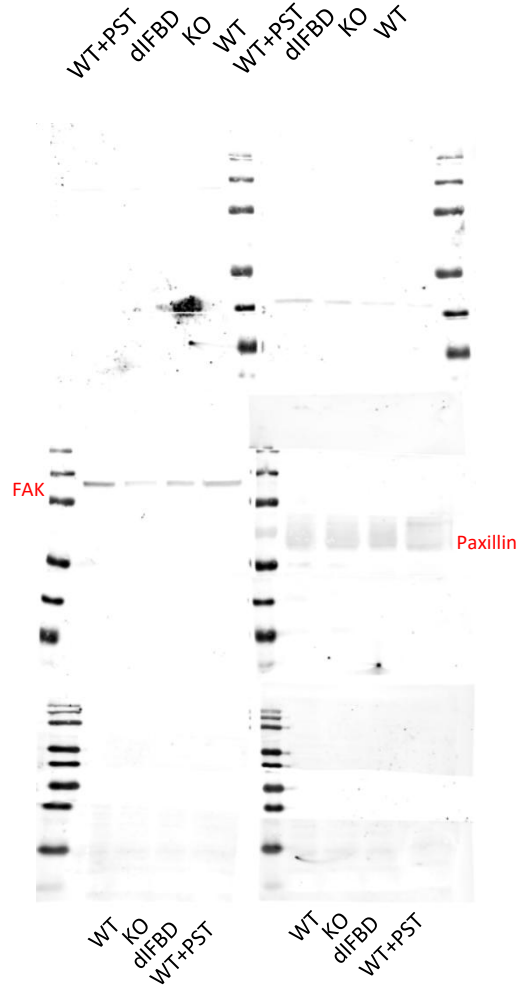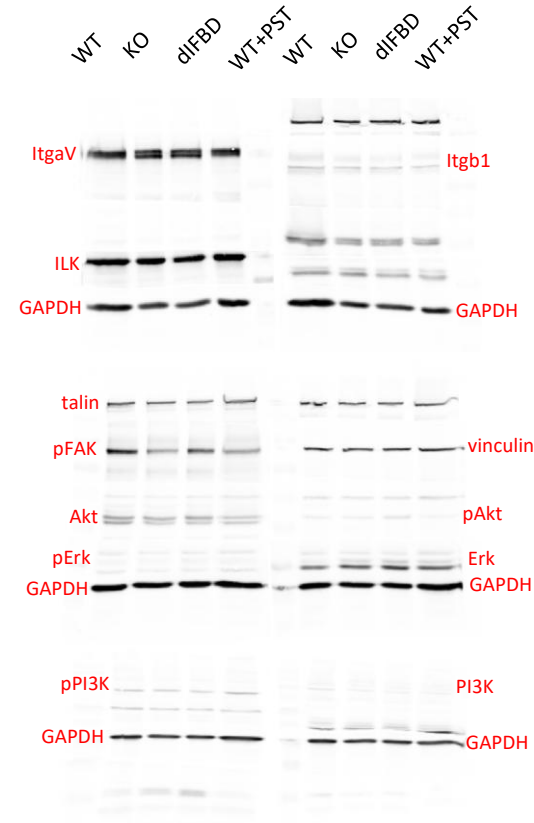

# Huh7 replicate 7 (230325)

Figure 3D

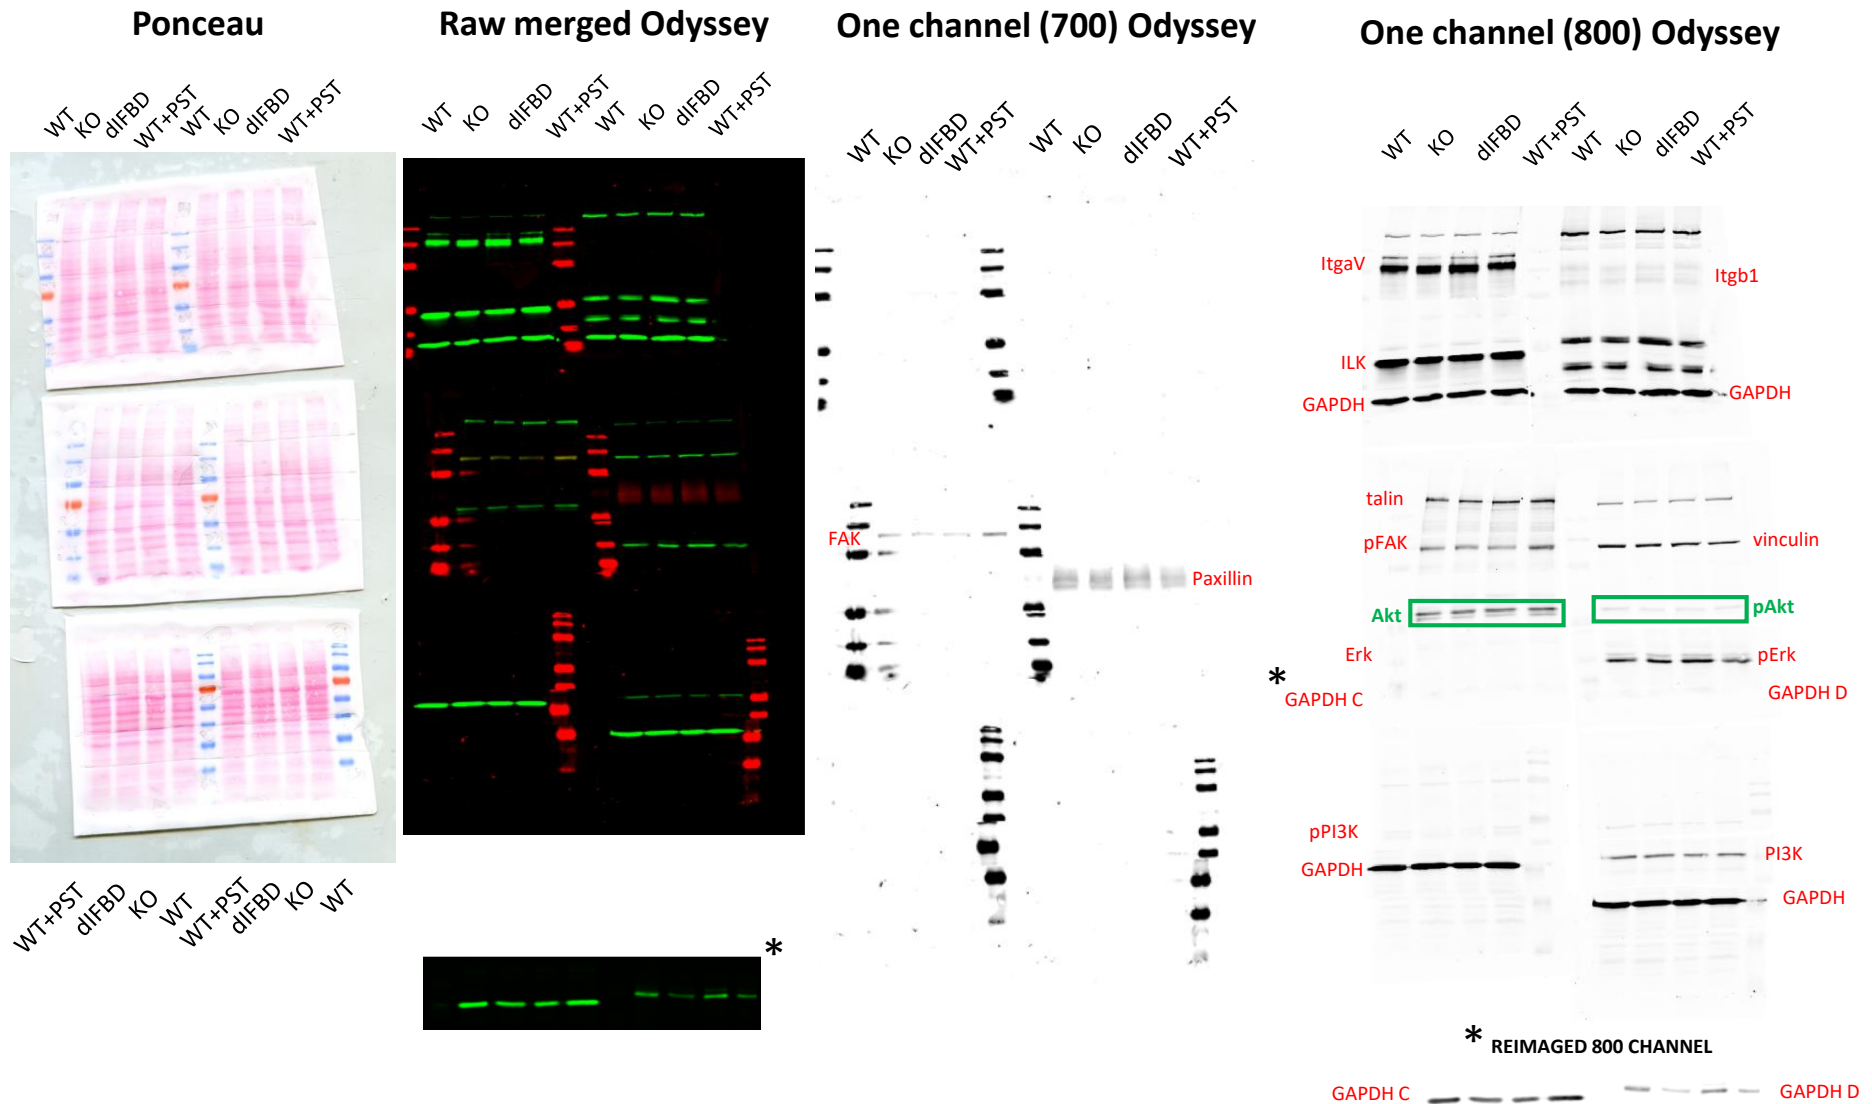

# Huh7 replicate 8 (230328)

Ponceau

WT KO dIFBD  
WT+PST WT KO dIFBD  
WT+PST

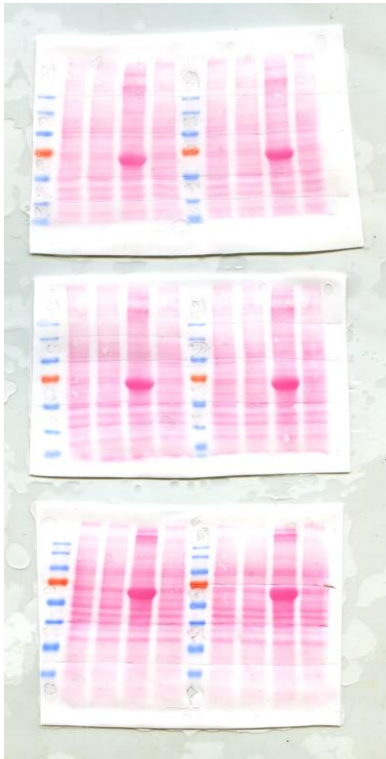

Raw merged Odyssey

WT KO dIFBD  
WT+PST WT KO dIFBD  
WT+PST

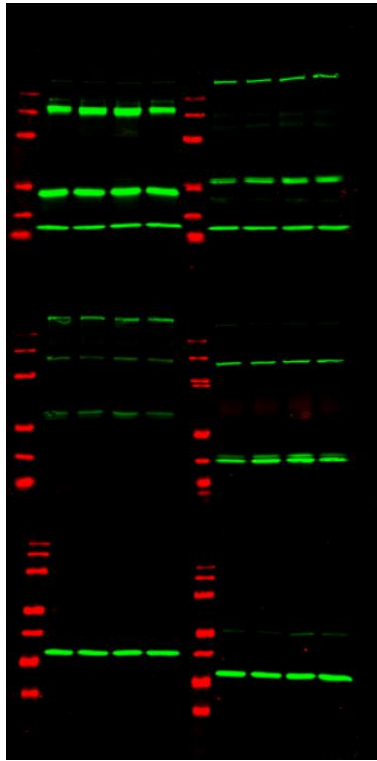

One channel (700) Odyssey

WT KO dIFBD  
WT+PST WT KO dIFBD  
WT+PST

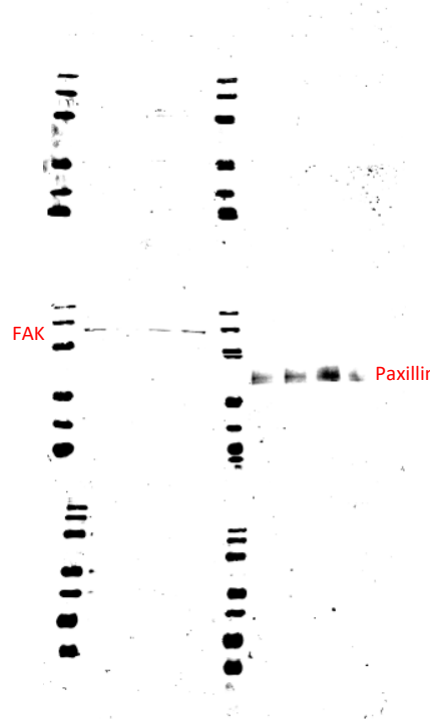

One channel (800) Odyssey

WT KO dIFBD  
WT+PST WT KO dIFBD  
WT+PST

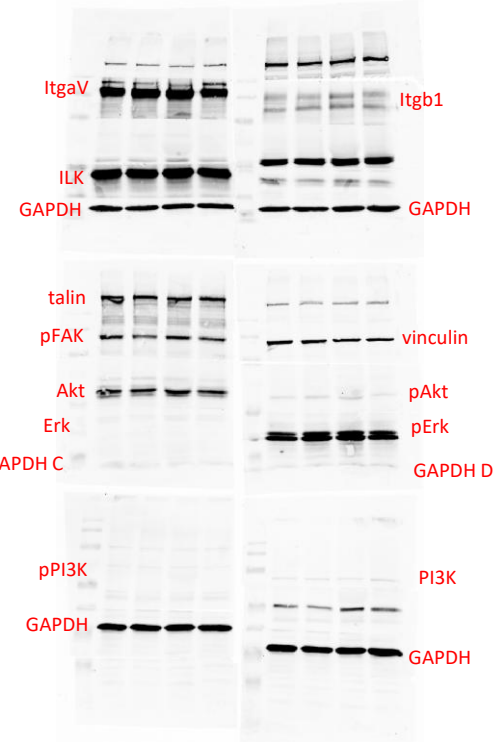

Marked

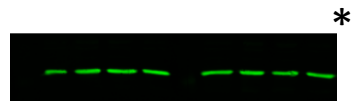

\*

\* REIMAGED 800 CHANNEL

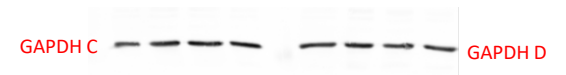

# Huh7 replicate 9 (230331)

**Ponceau**

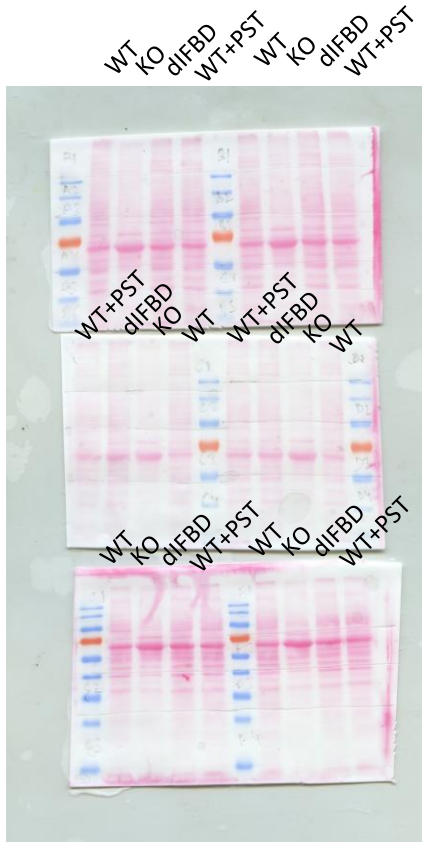

**Raw merged Odyssey**

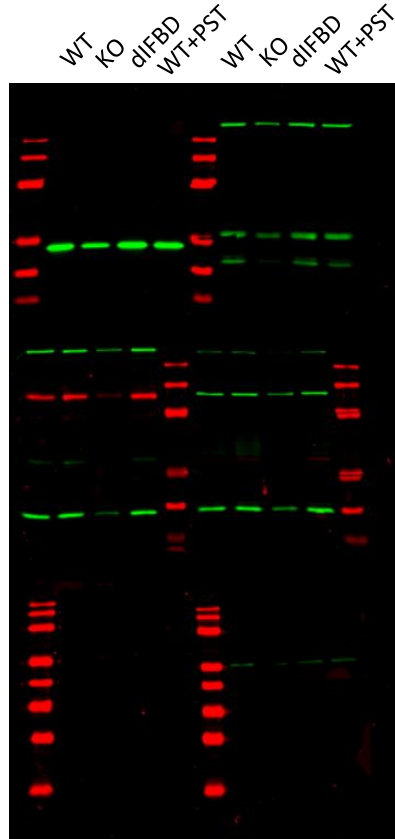

**One channel (700) Odyssey**

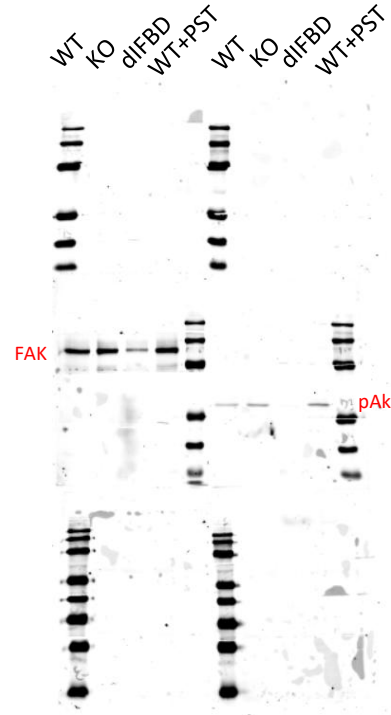

**One channel (800) Odyssey**

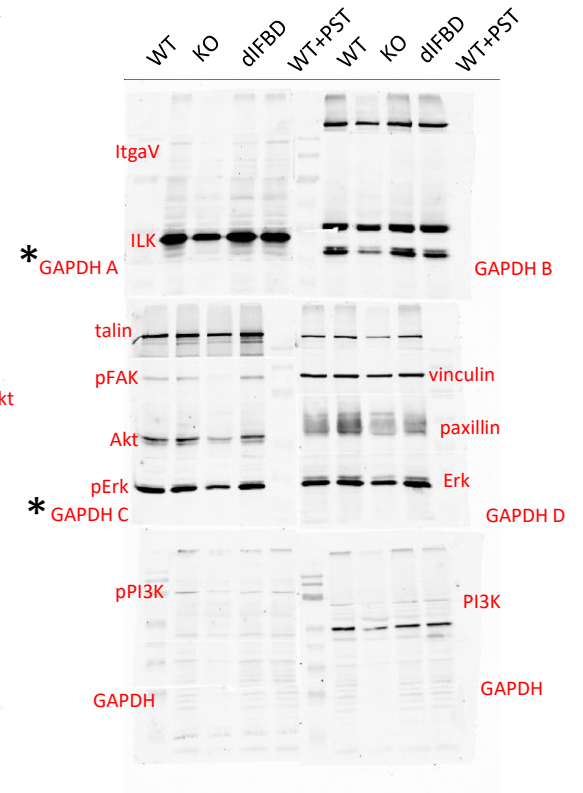

**\* reimaged GAPDH**

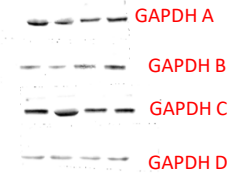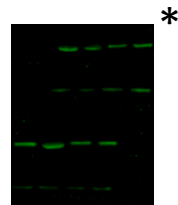

Supplement: fig3-data1 [file elife-102205-fig3-data1-v1.pdf]
