# Supplementary material for: Plectin-mediated cytoskeletal crosstalk as a target for inhibition of hepatocellular carcinoma growth and metastasis
Source: eLife journal article supplement (doi:10.7554/elife.102205), 2024-10-16

# SNU-475 replicate 1 (221209)

Figure 3 – figure supplement 1C

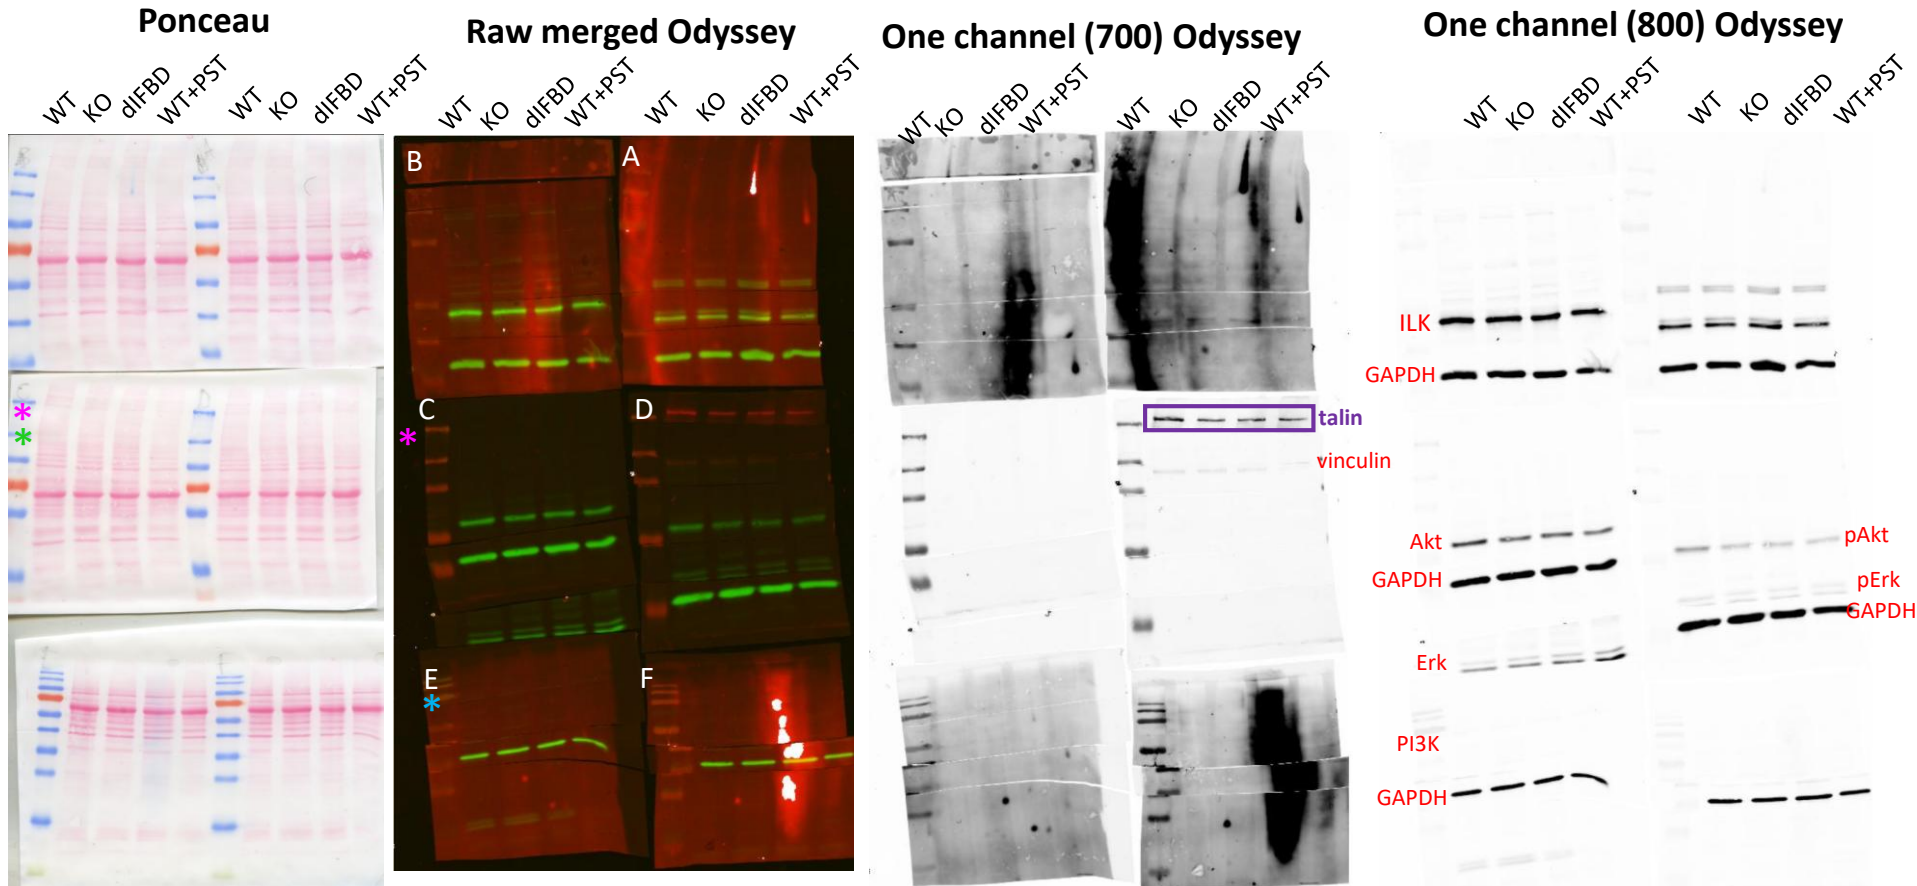

\* pFAK (rabbit 800) and FAK (mouse 700) remained on membrane C (file 230105)

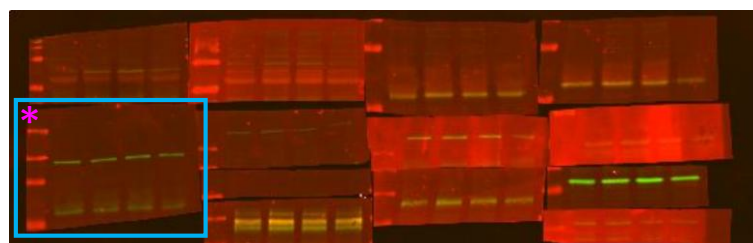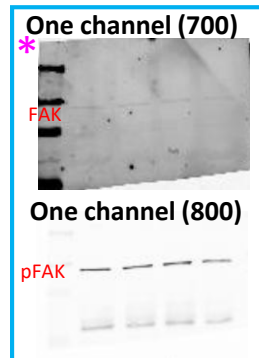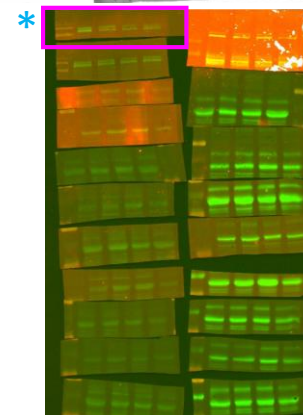

\* Integrin b1 stained on membrane E (file 230310)

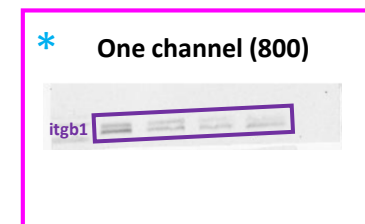

# SNU-475 replicate 2 and 3 (221216)

Figure 3 – figure supplement 1C

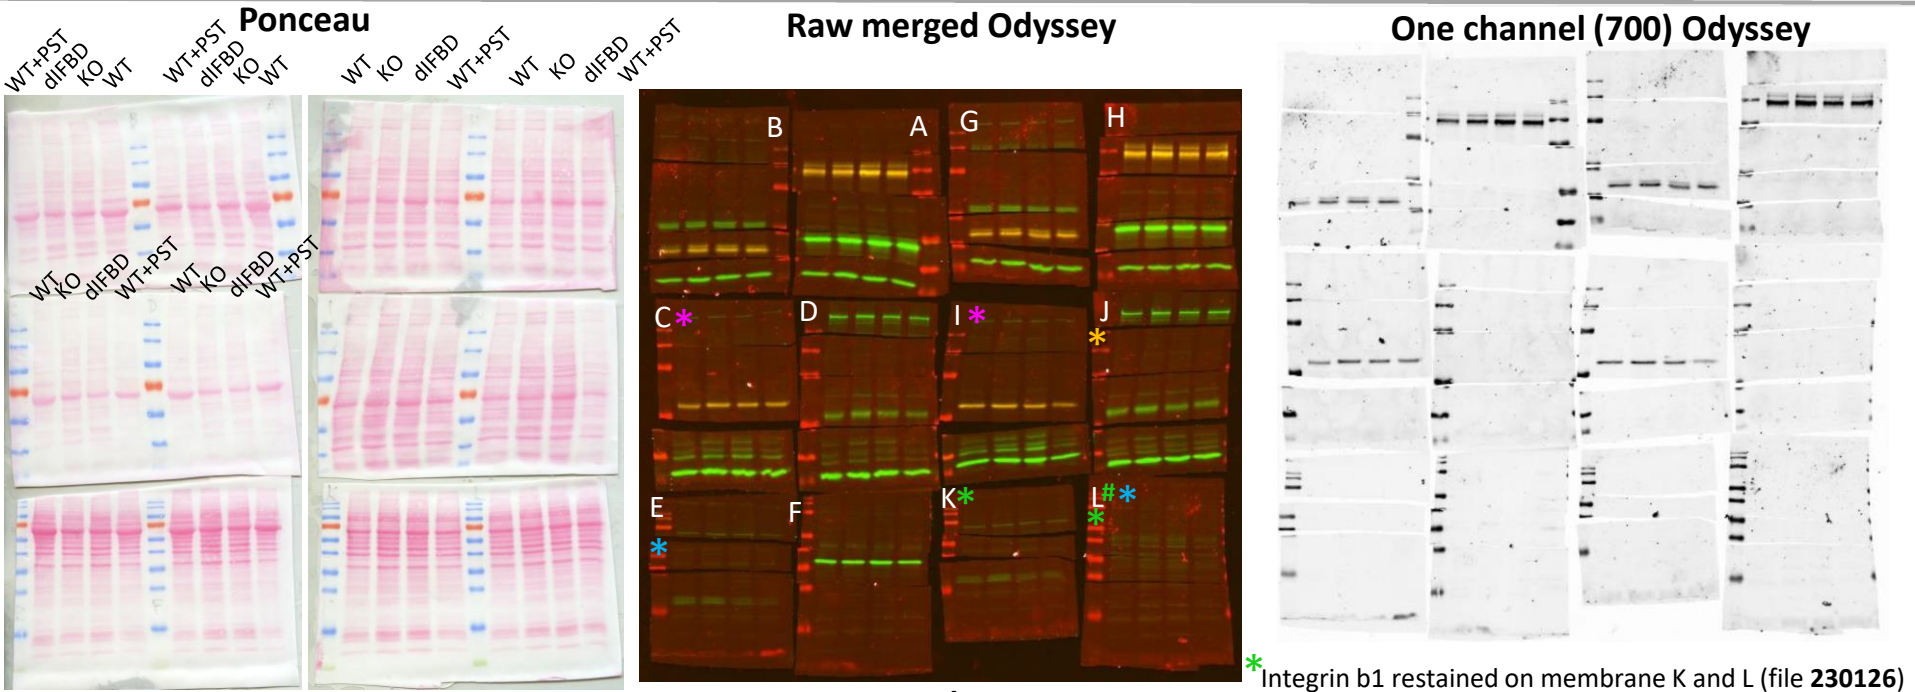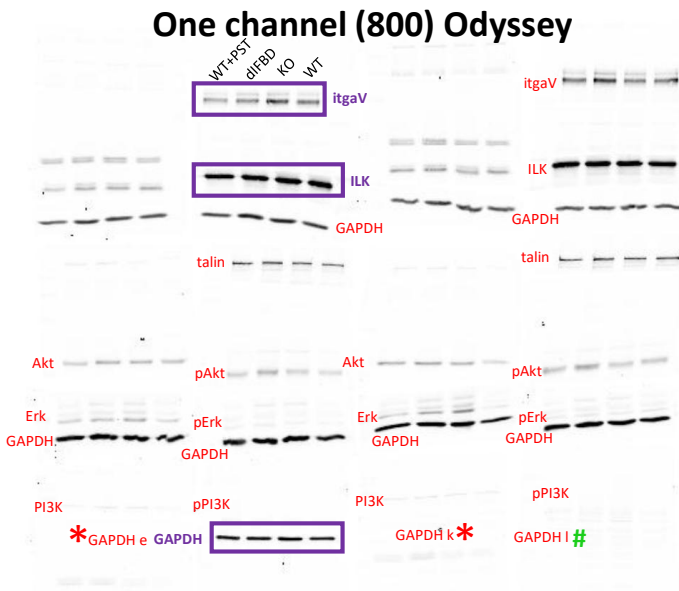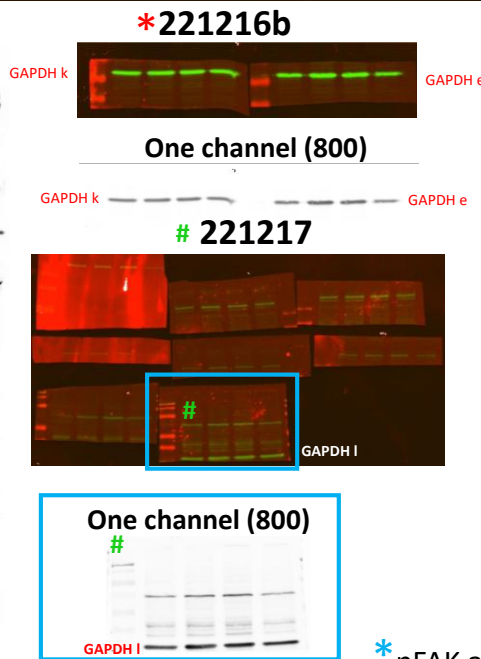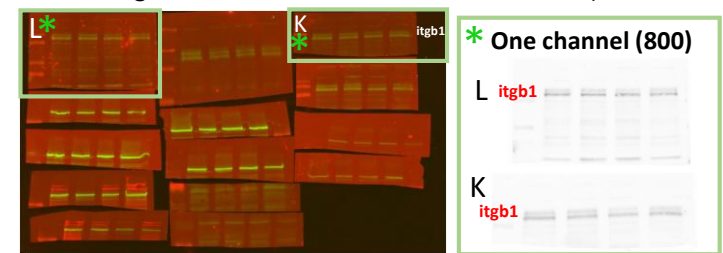

\* paxillin retained on membranes C and I  
\* vinculin retained on membrane J (file 230105)

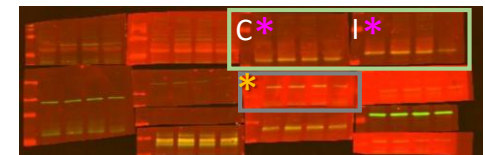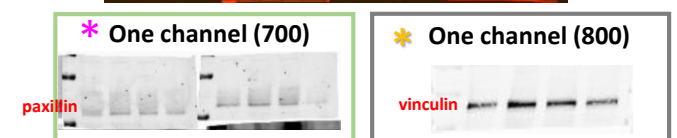

\* pFAK and FAK retained on membranes L and E (see next page)

# SNU-475 replicate 4 and 5 (221221)

Figure 3 – figure supplement 1C

Ponceau

Raw merged Odyssey

One channel (700) Odyssey

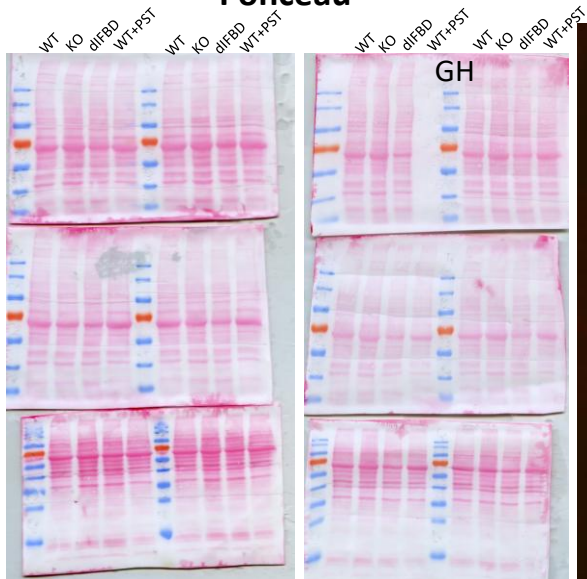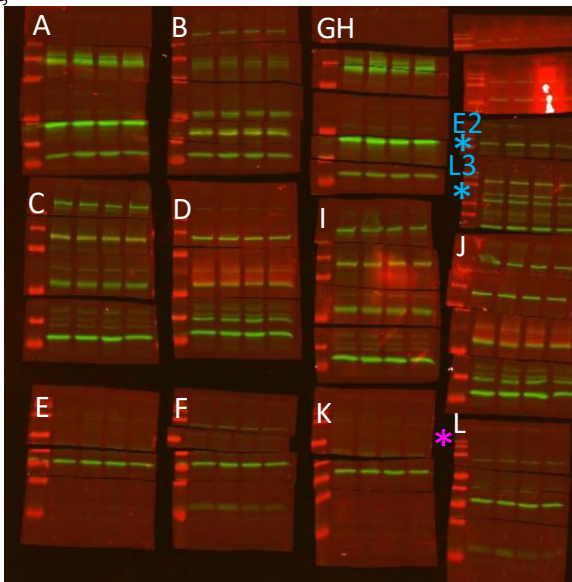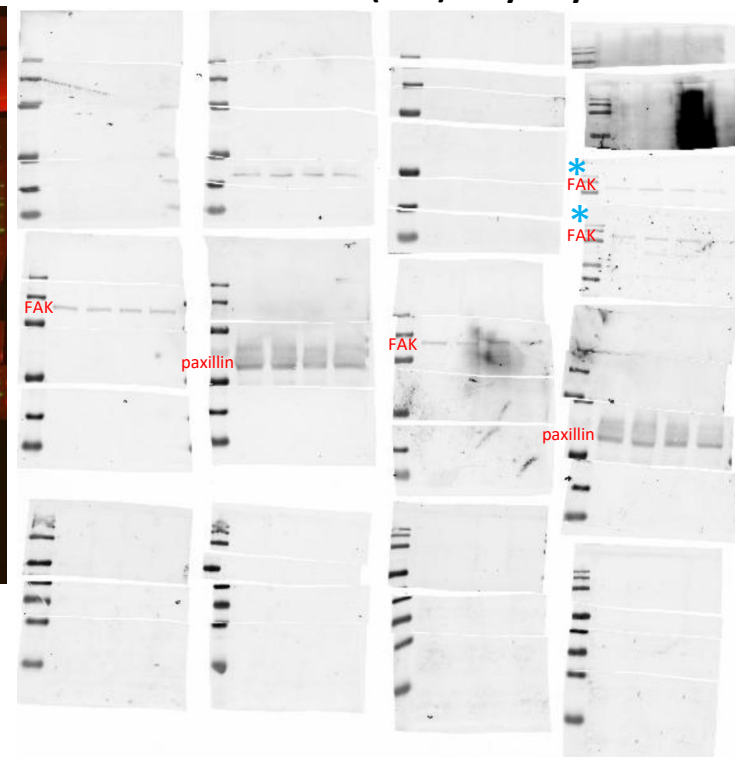

One channel (800) Odyssey

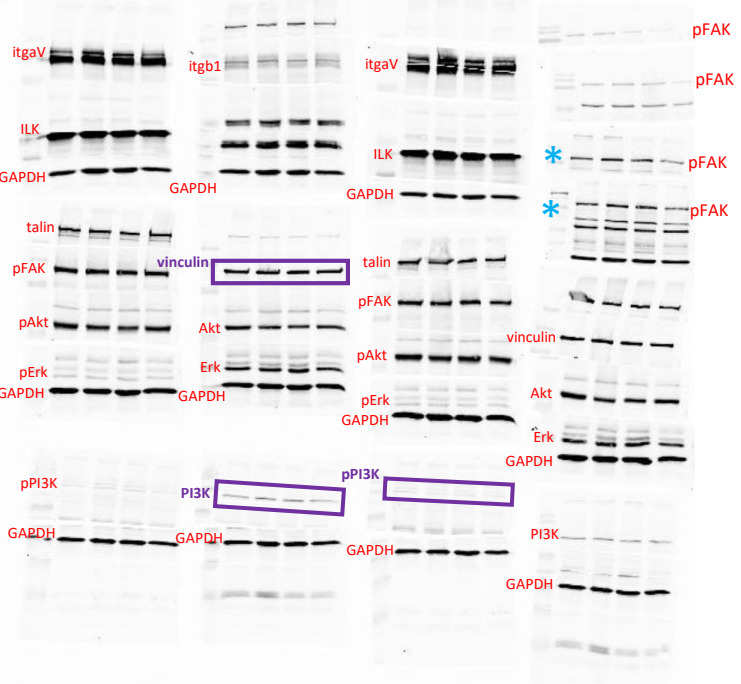

\* Integrin b1 of 5th replicate stained on membrane L (file 230126)

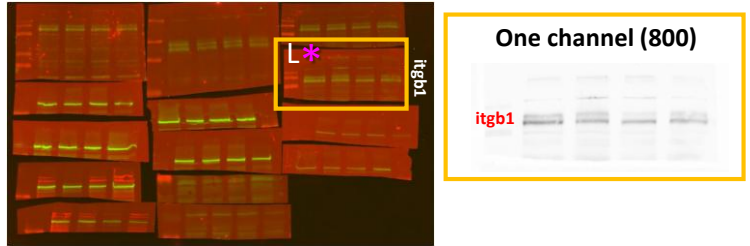

\* pFAK and FAK from 221216 remained on membrane E and L (see \* on previous page).

# Huh7 replicate 1 and SNU-475 replicate 6 (230125)

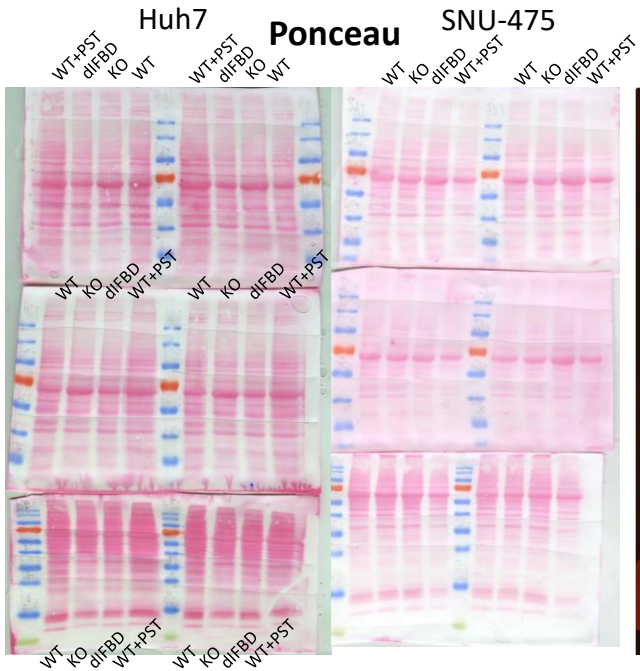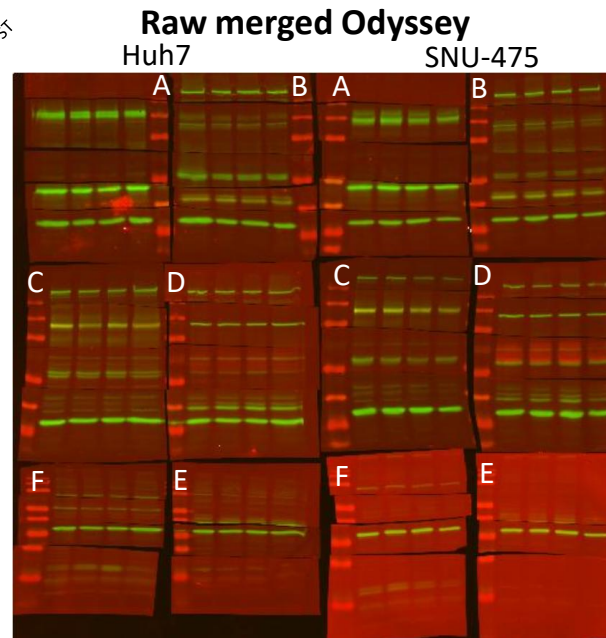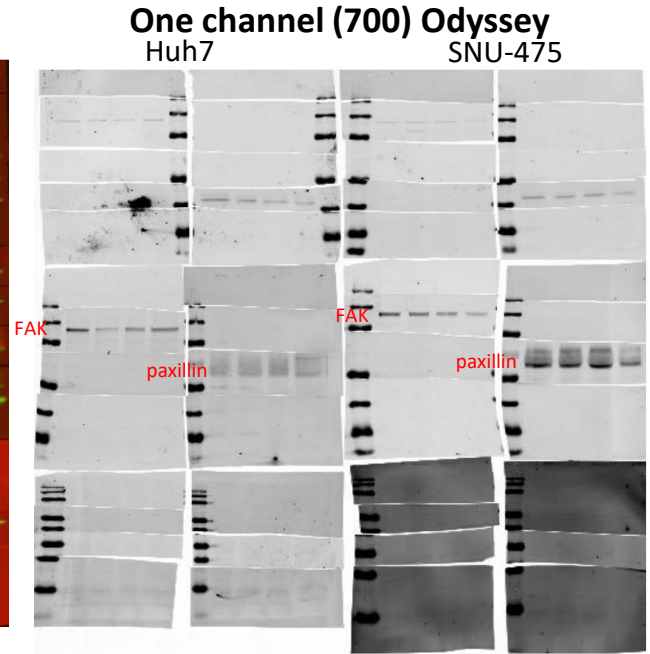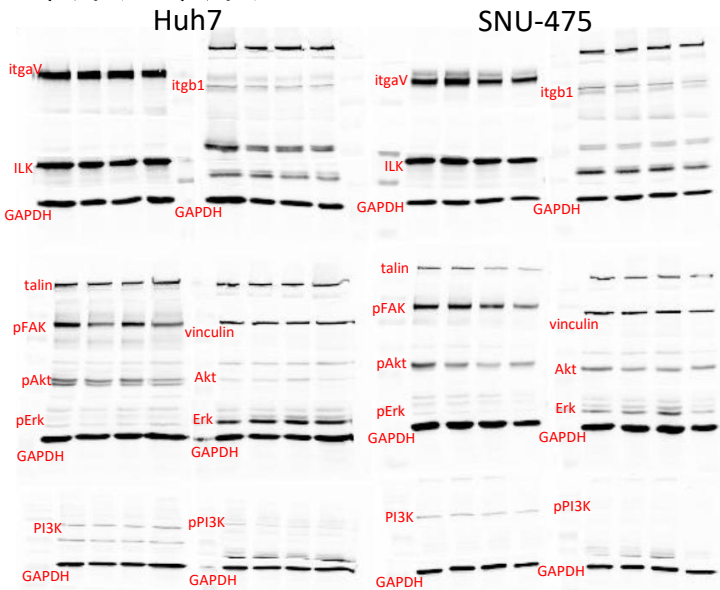

# SNU-475 replicate 7 and 8 (230224)

Figure 3 – figure supplement 1C

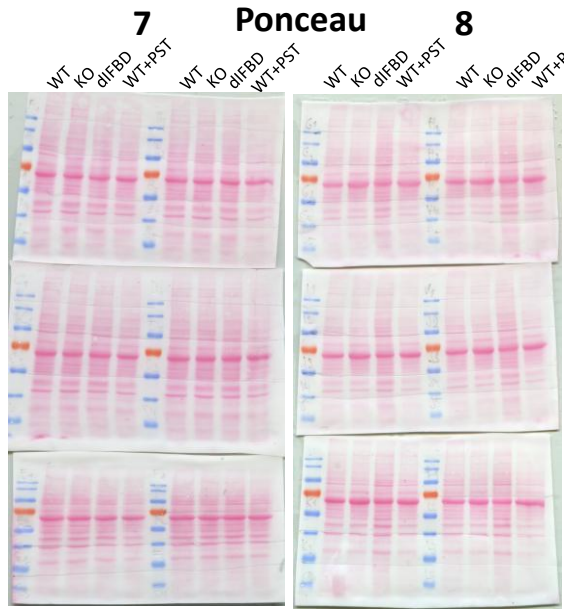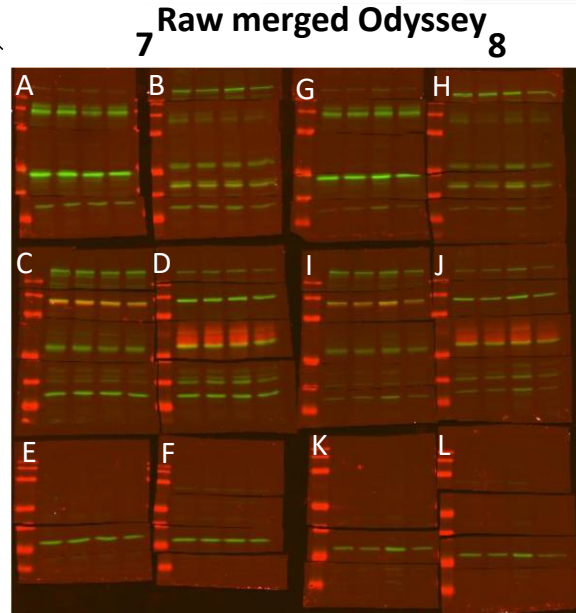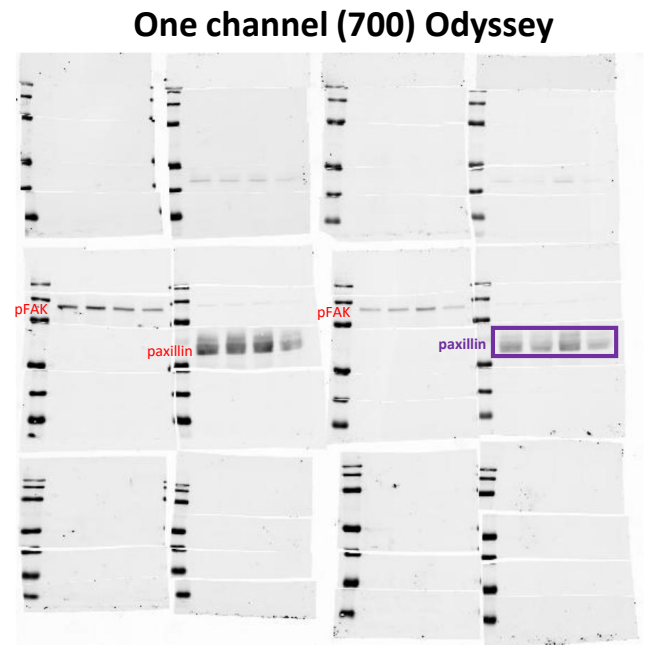

**One channel (800) Odyssey**

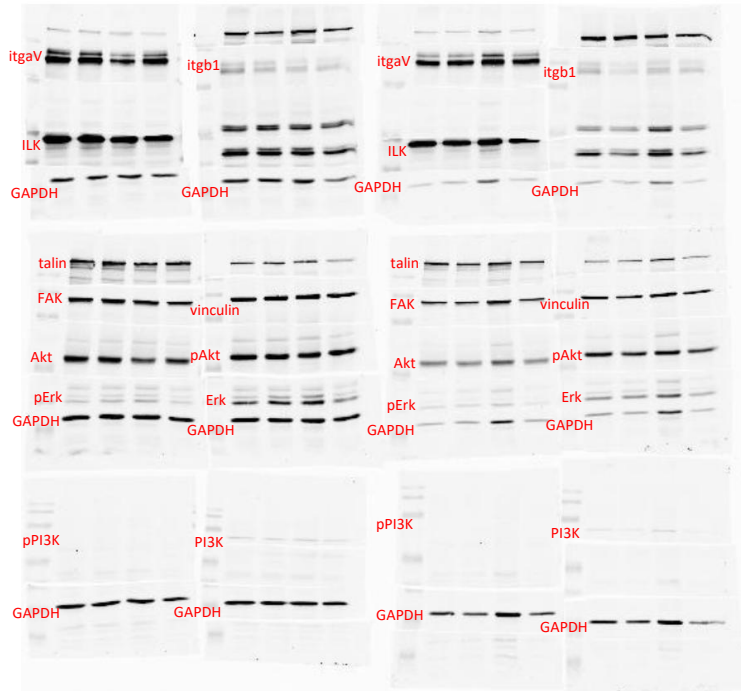

# SNU-475 replicate 9 (230305)

Ponceau

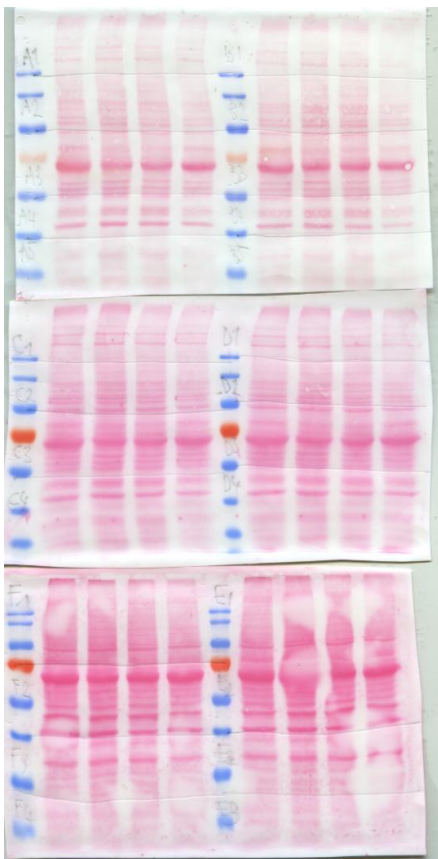

Raw merged Odyssey

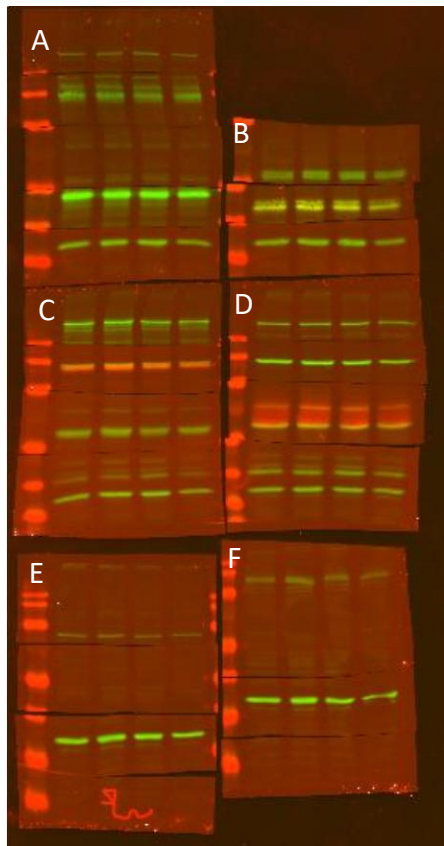

One channel (700) Odyssey

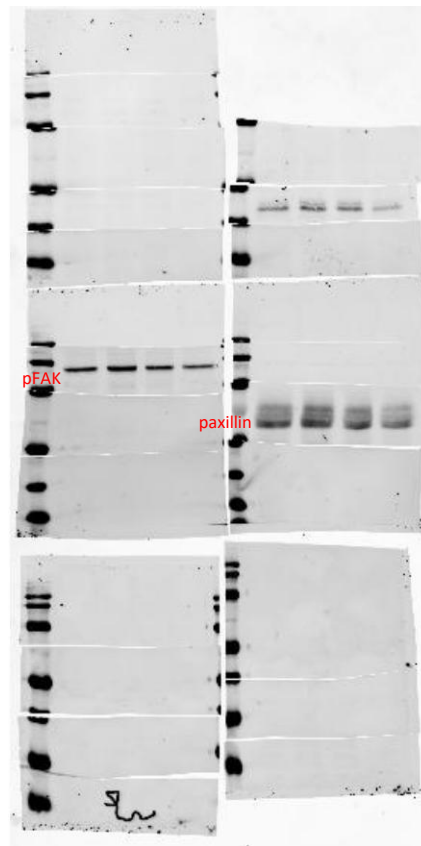

One channel (800) Odyssey

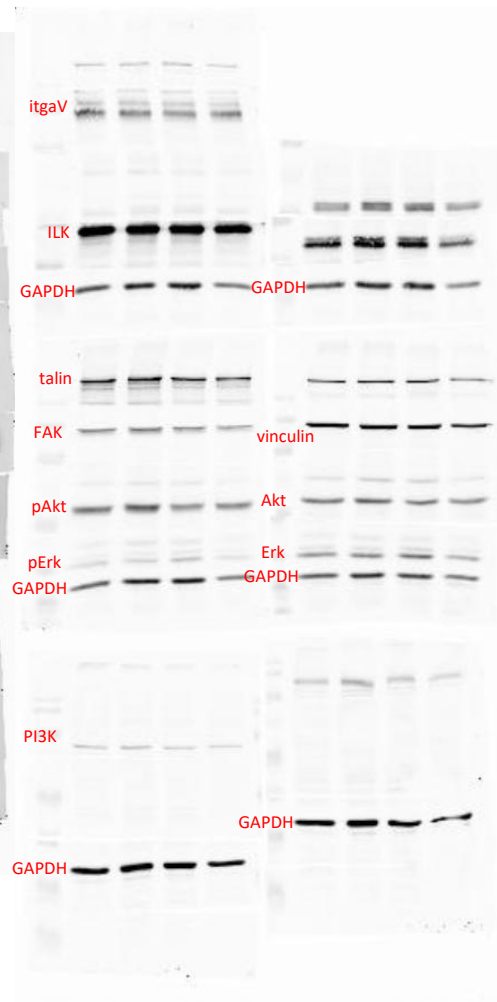

230308

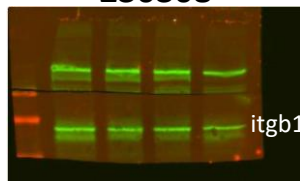

One channel (800) Odyssey

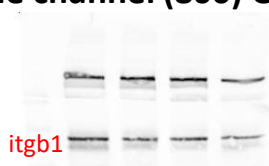

# Huh7 replicate 2 (230113)

Ponceau

Raw merged Odyssey

One channel (700) Odyssey

One channel (800) Odyssey

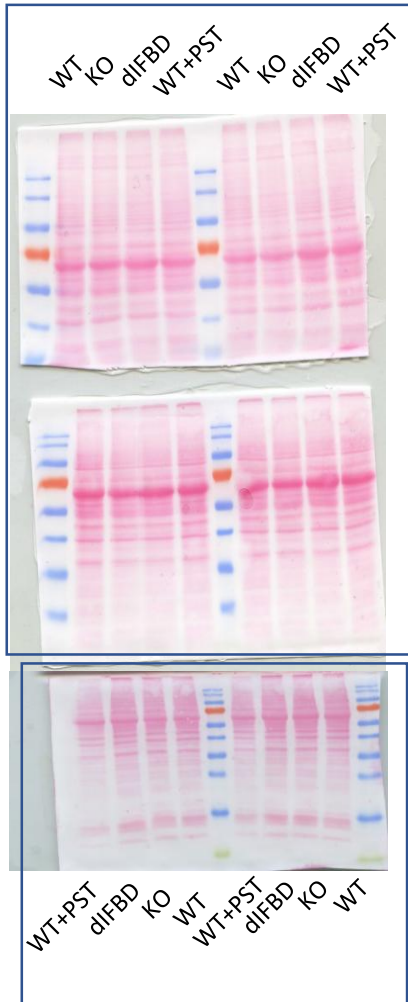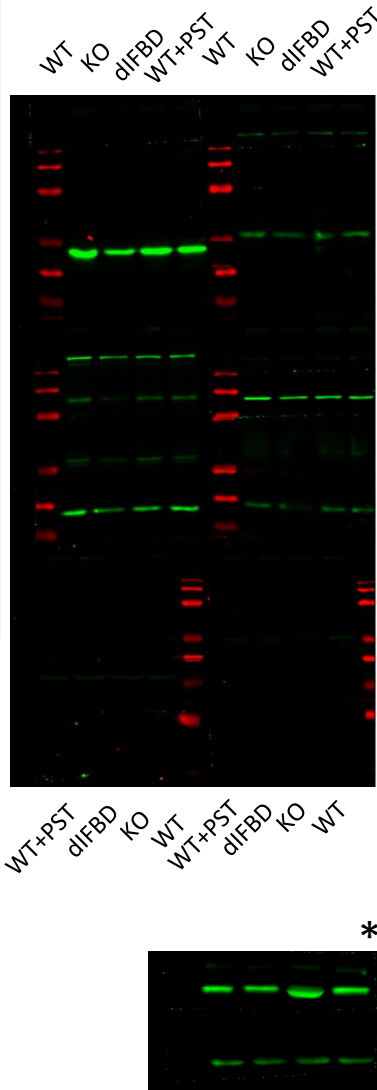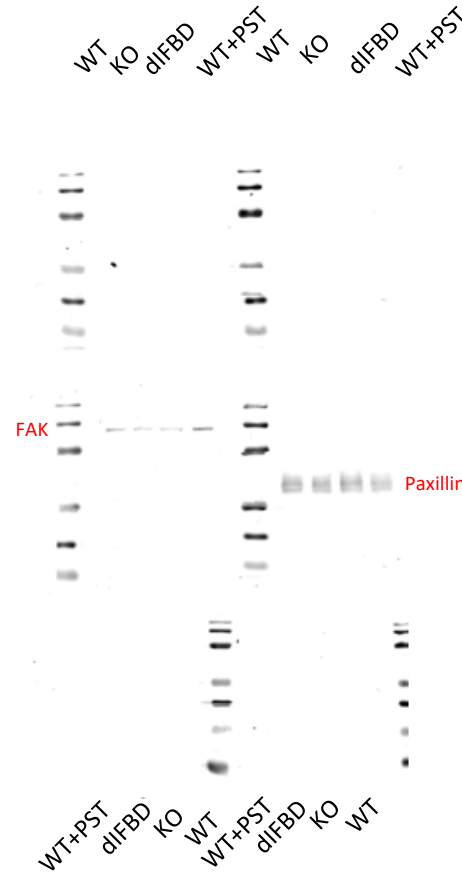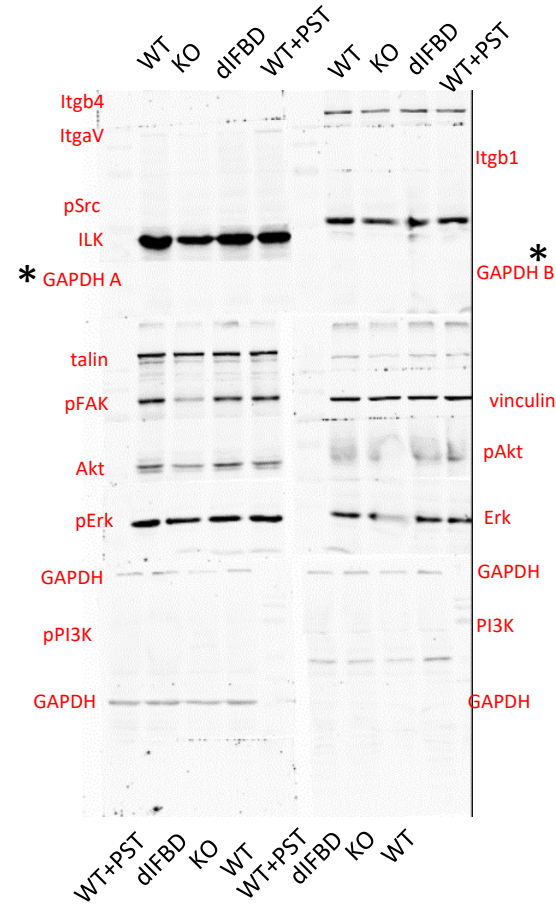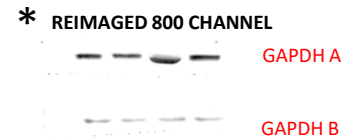

# Huh7 replicate 3 (230117)

Ponceau

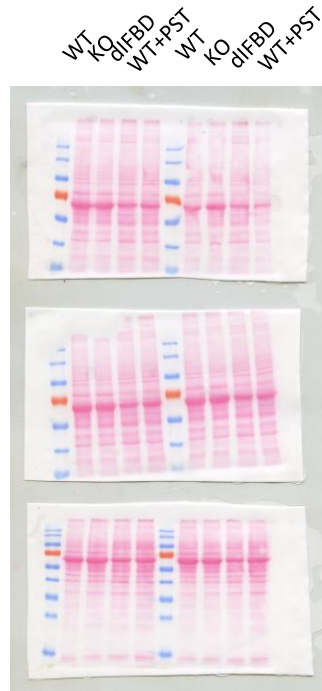

Raw merged Odyssey

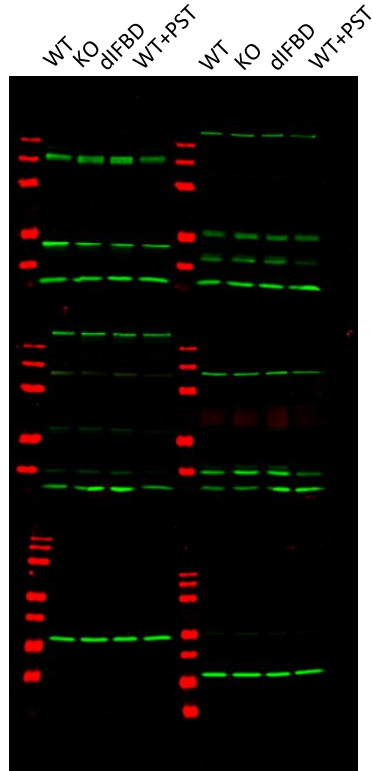

One channel (700) Odyssey

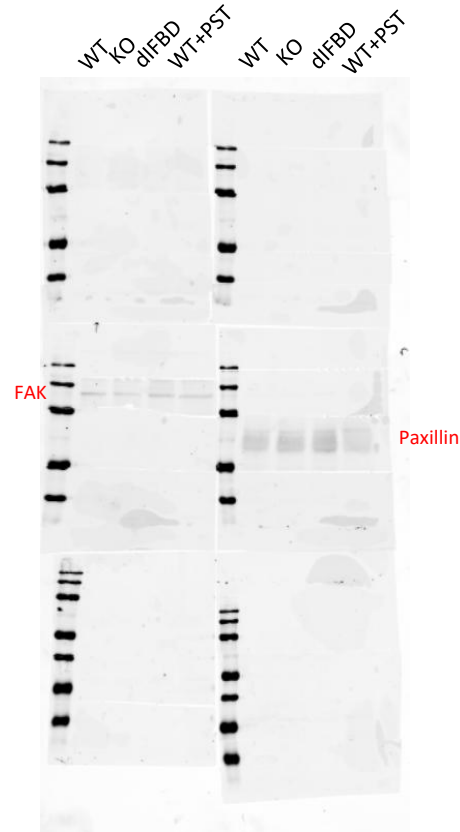

One channel (800) Odyssey

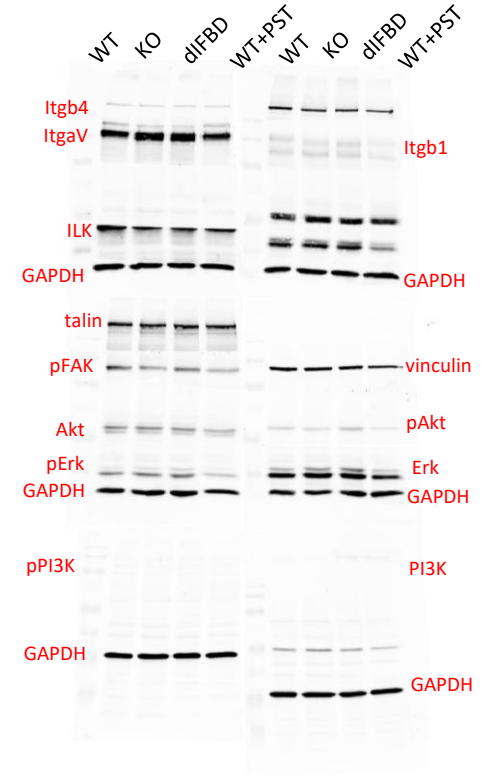





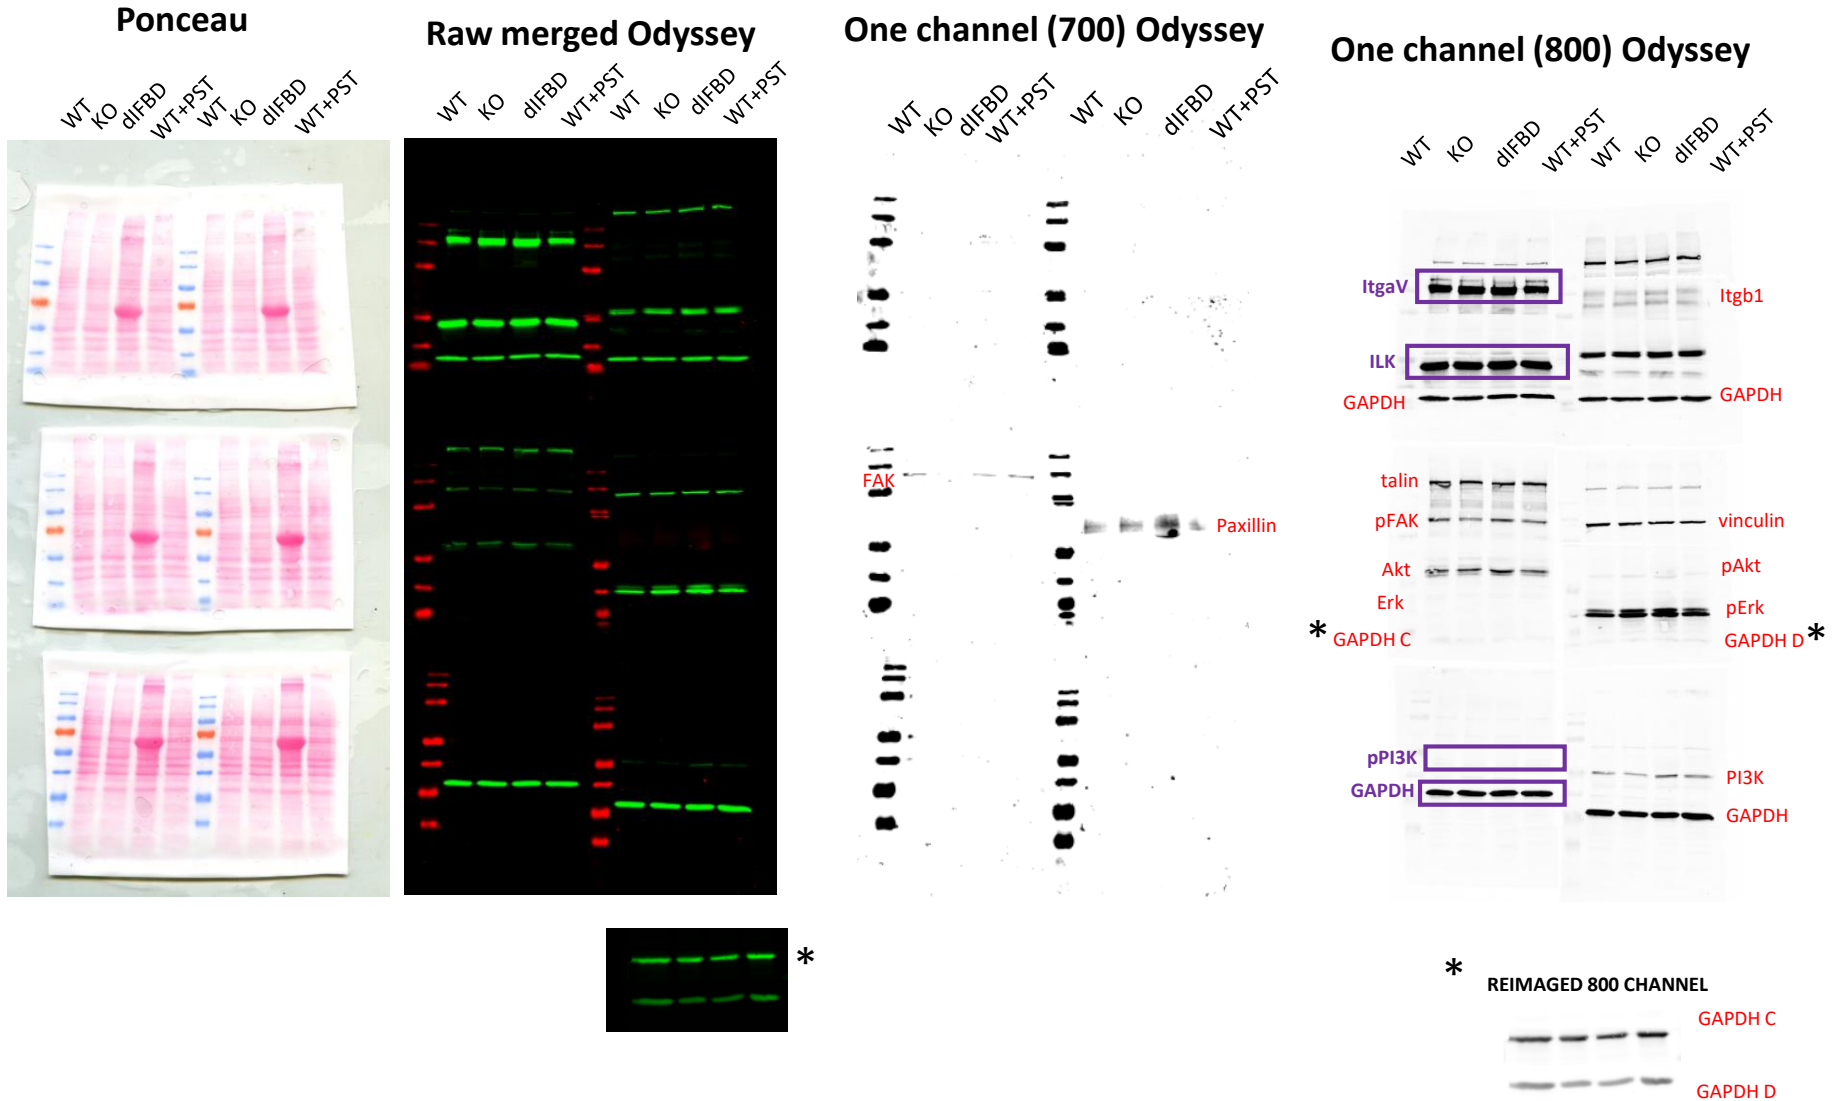

## Ponceau

## Raw merged Odyssey

## One channel (700) Odyssey

## One channel (800) Odyssey

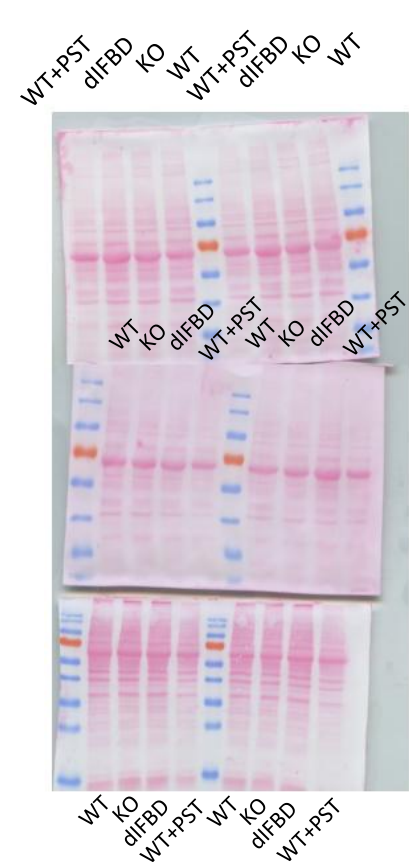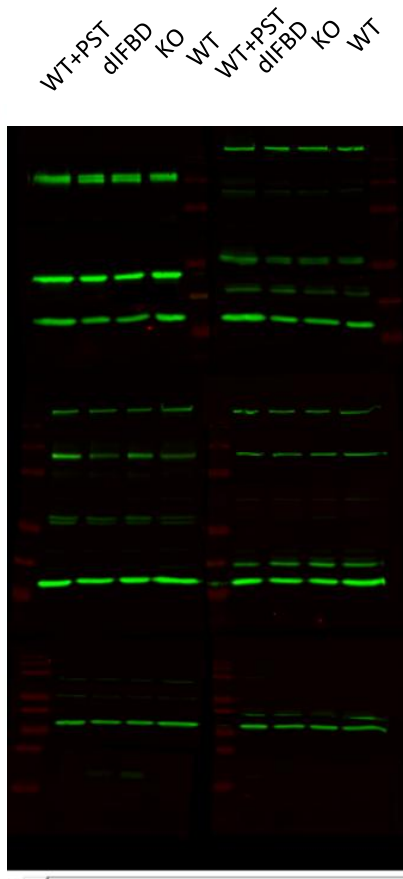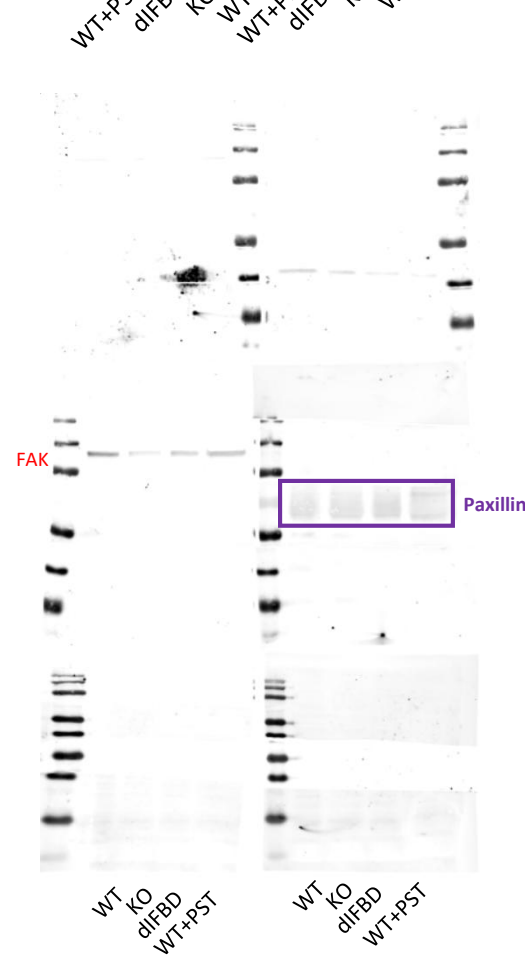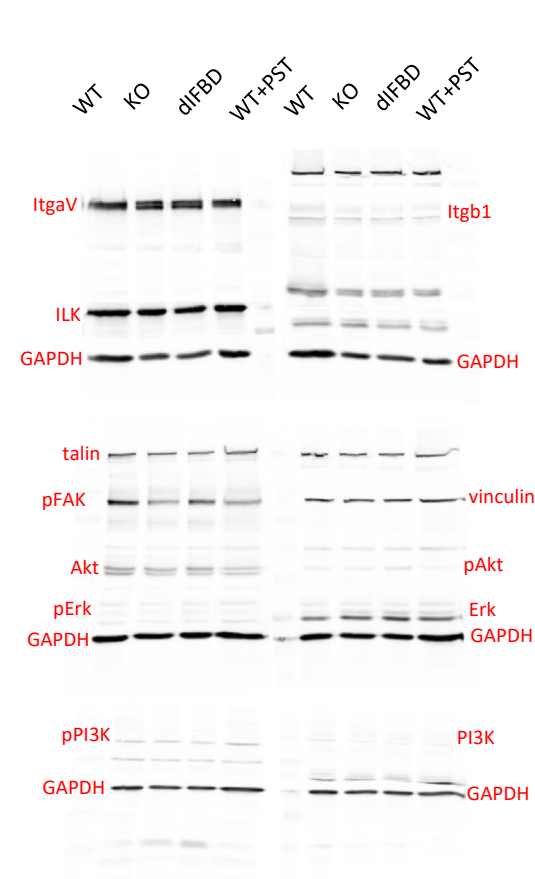

# Huh7 replicate 7 (230325)

Figure 3 – figure supplement 1C

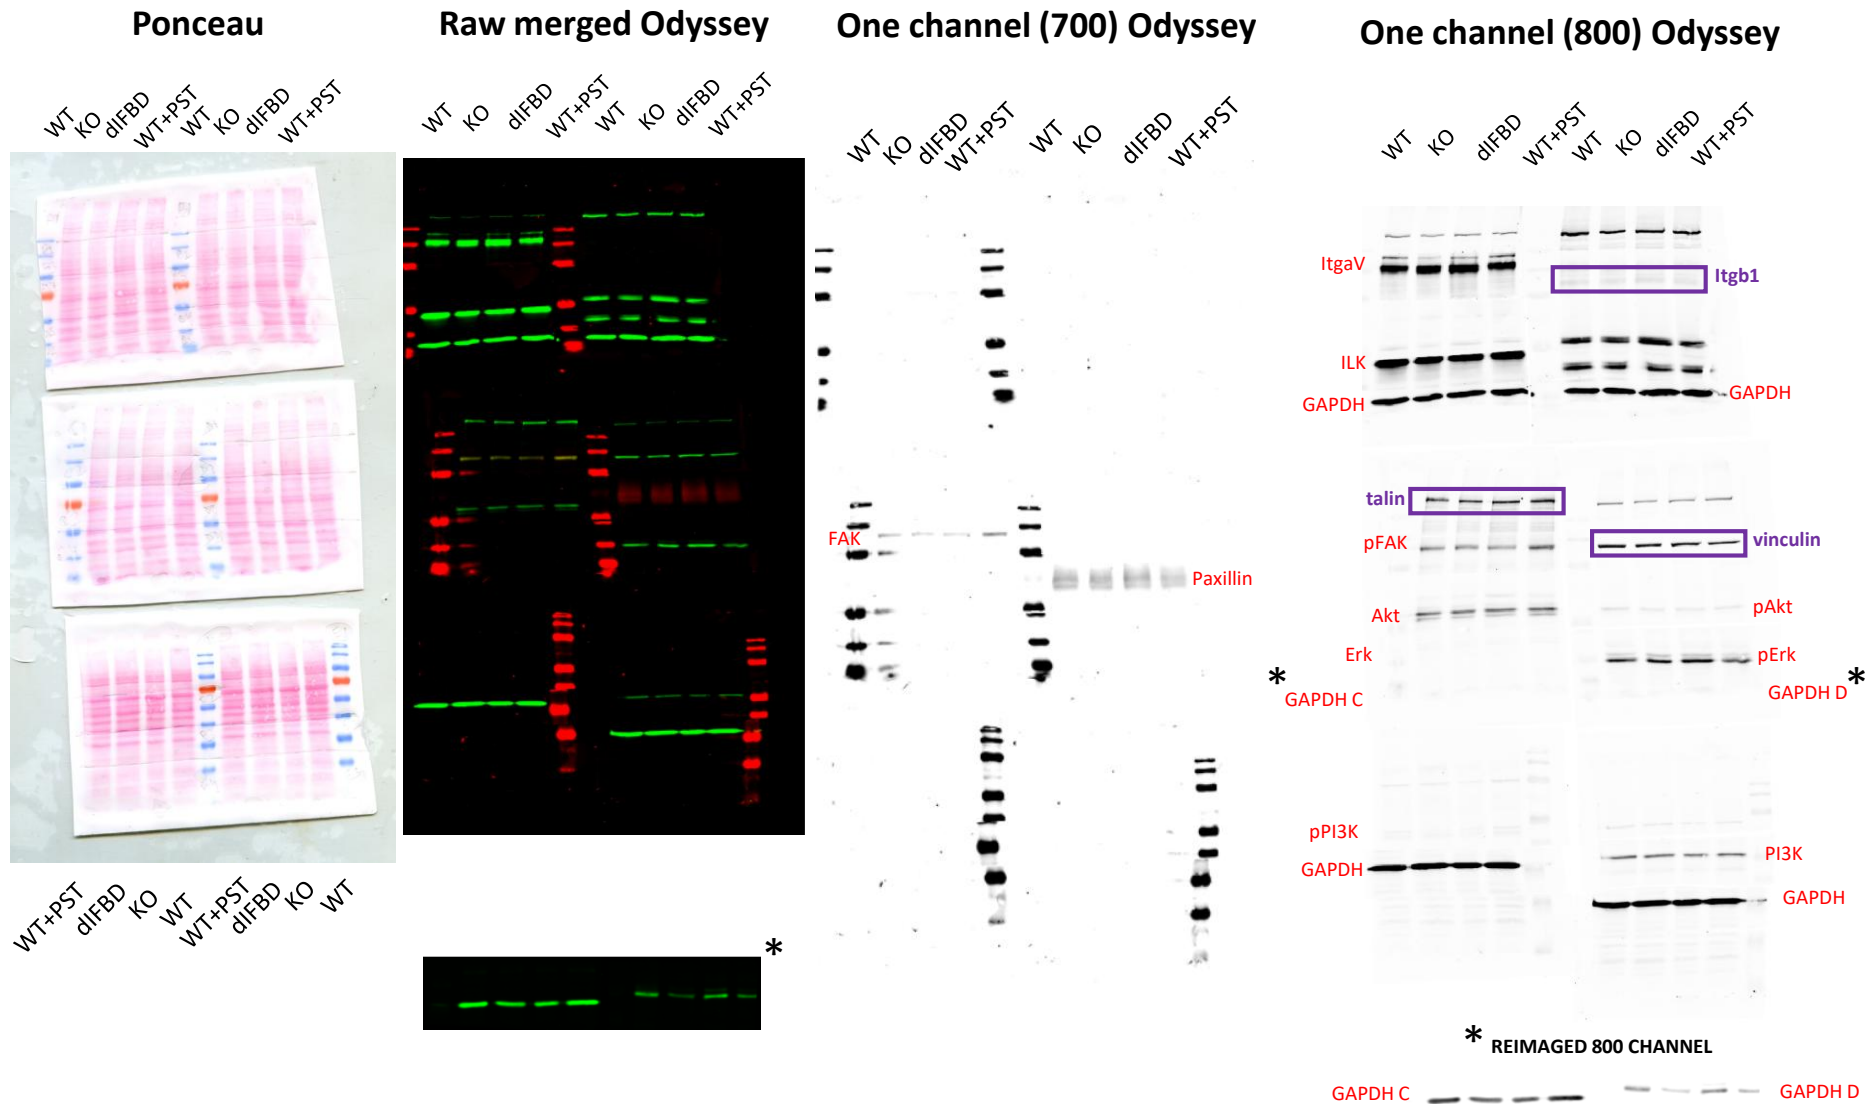

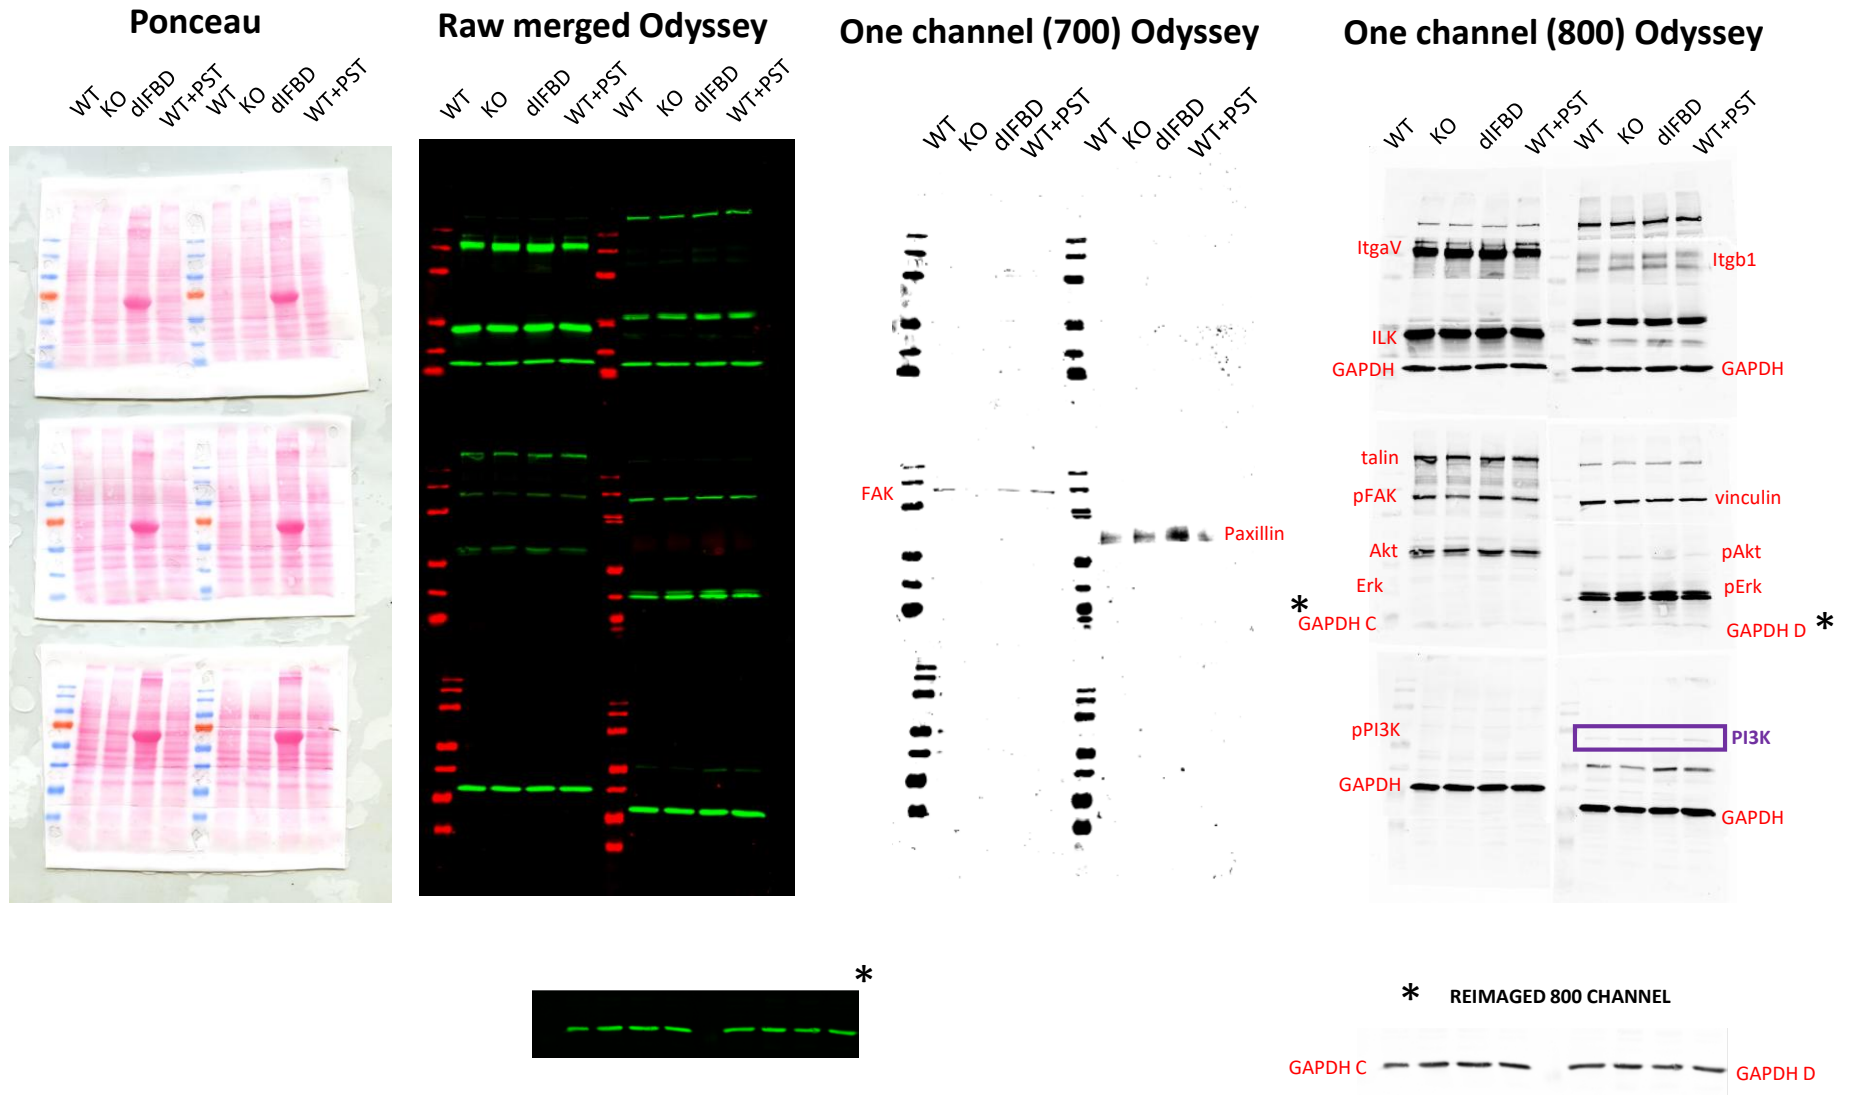

# Huh7 replicate 9 (230331)

**Ponceau**

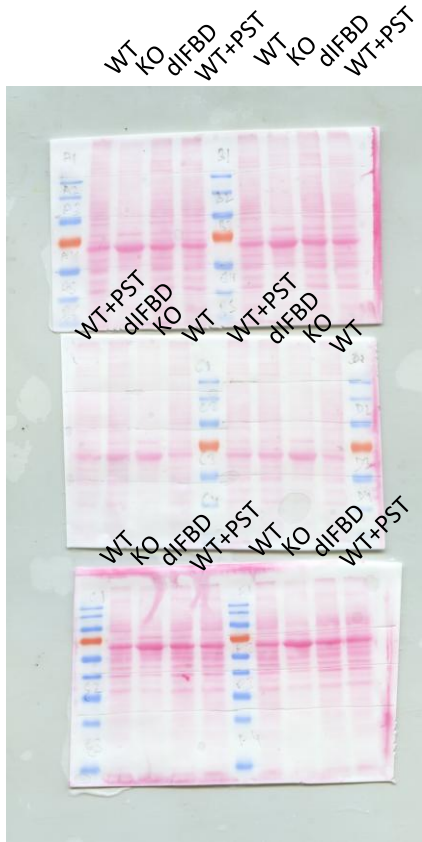

**Raw merged Odyssey**

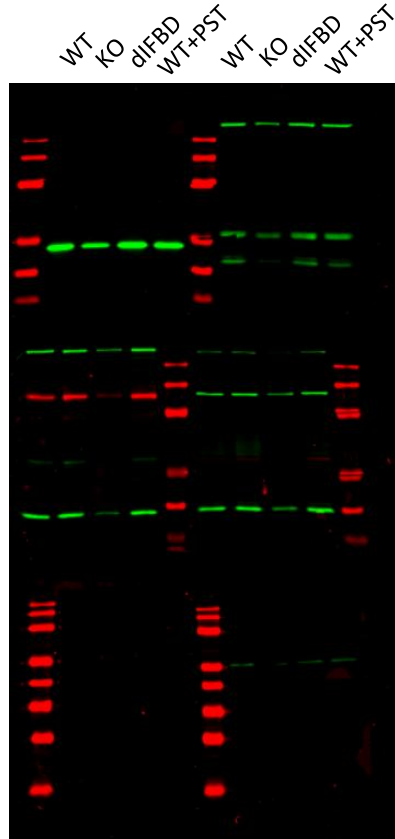

**One channel (700) Odyssey**

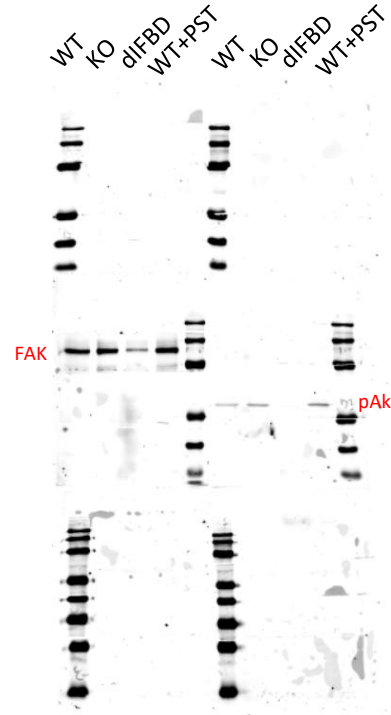

**One channel (800) Odyssey**

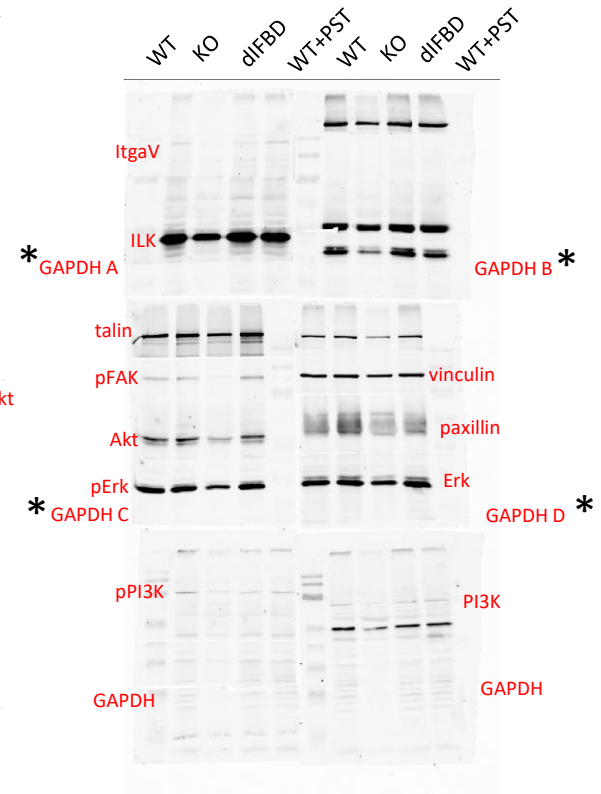

**\* reimaged GAPDH**

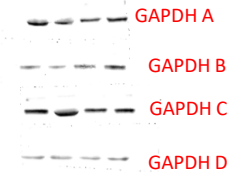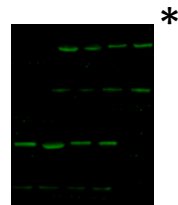

Supplement: fig3-figsupp1-data1 [file elife-102205-fig3-figsupp1-data1-v1.pdf]
