# Supplementary material for: Plectin-mediated cytoskeletal crosstalk as a target for inhibition of hepatocellular carcinoma growth and metastasis
Source: eLife journal article supplement (doi:10.7554/elife.102205), 2024-10-16

vimentin

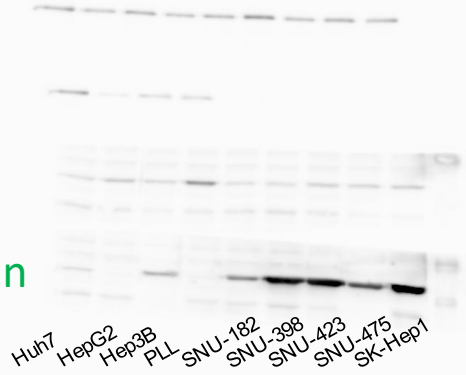

GAPDH

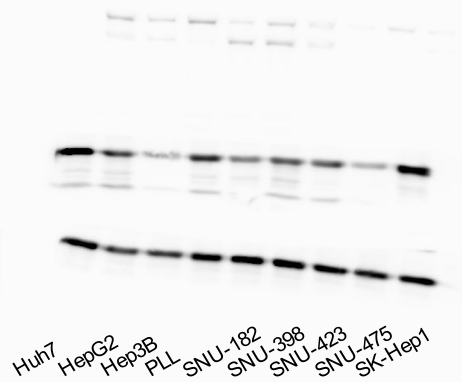

E-cad

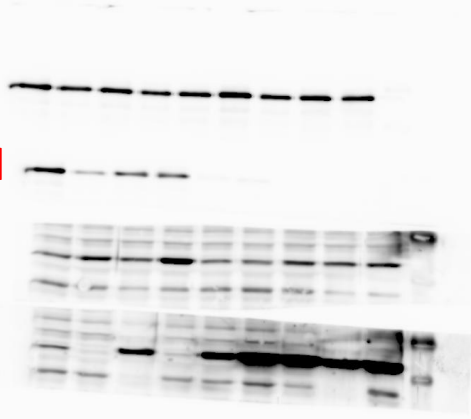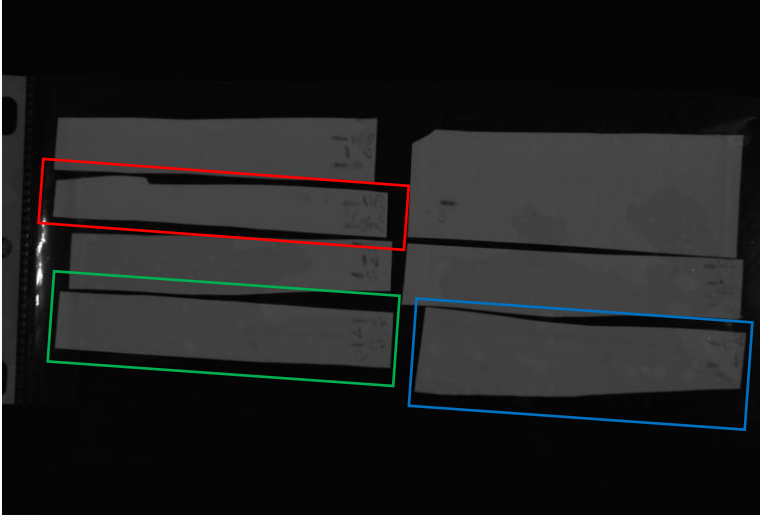

plectin

Huh7 HepG2 Hep3B PLL SNU-182 SNU-398 SNU-423 SNU-475 SK-Hep1

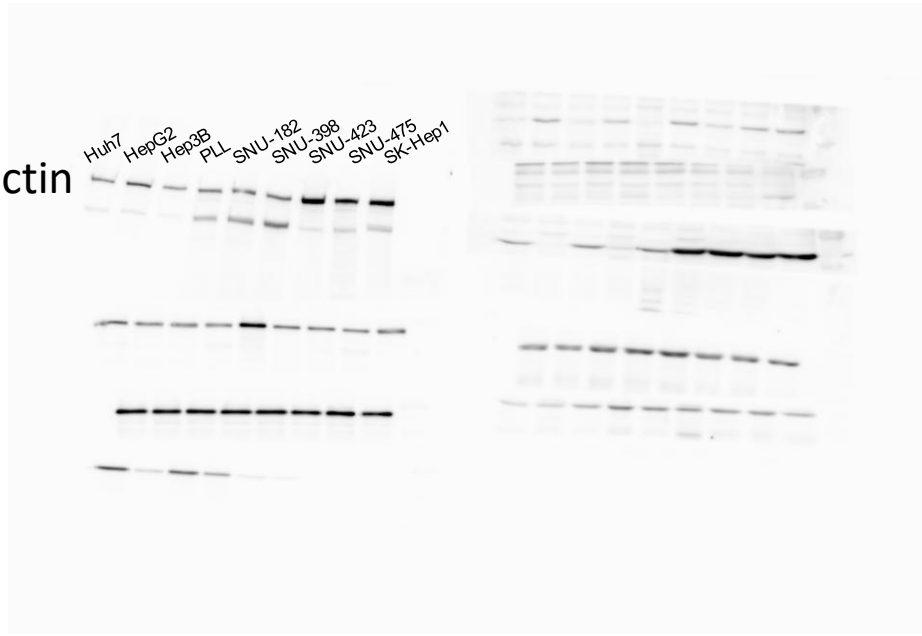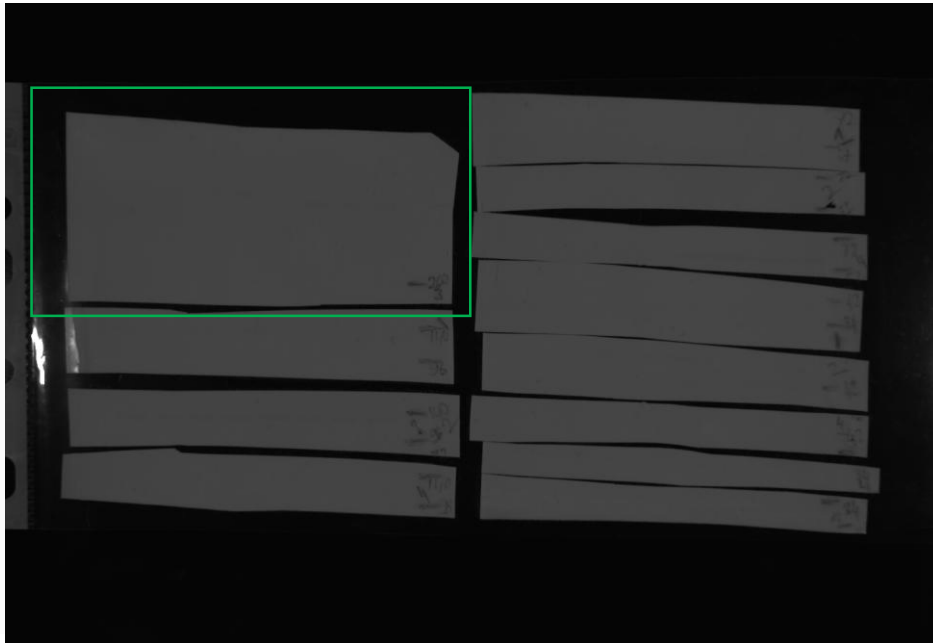

Supplement: fig1-data1 [file elife-102205-fig1-data1-v1.pdf]
