# Supplementary material for: Plectin-mediated cytoskeletal crosstalk as a target for inhibition of hepatocellular carcinoma growth and metastasis
Source: eLife journal article supplement (doi:10.7554/elife.102205), 2024-10-16

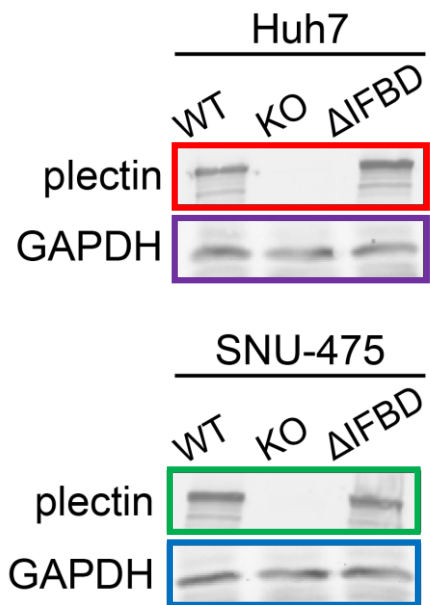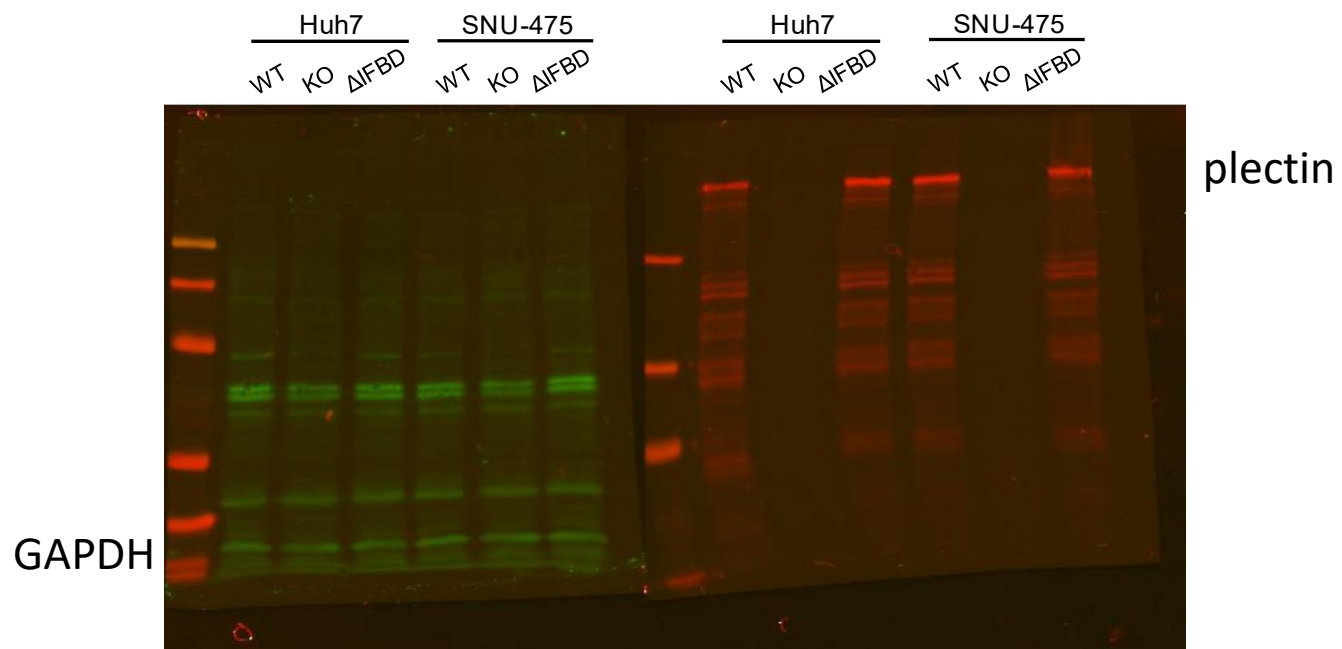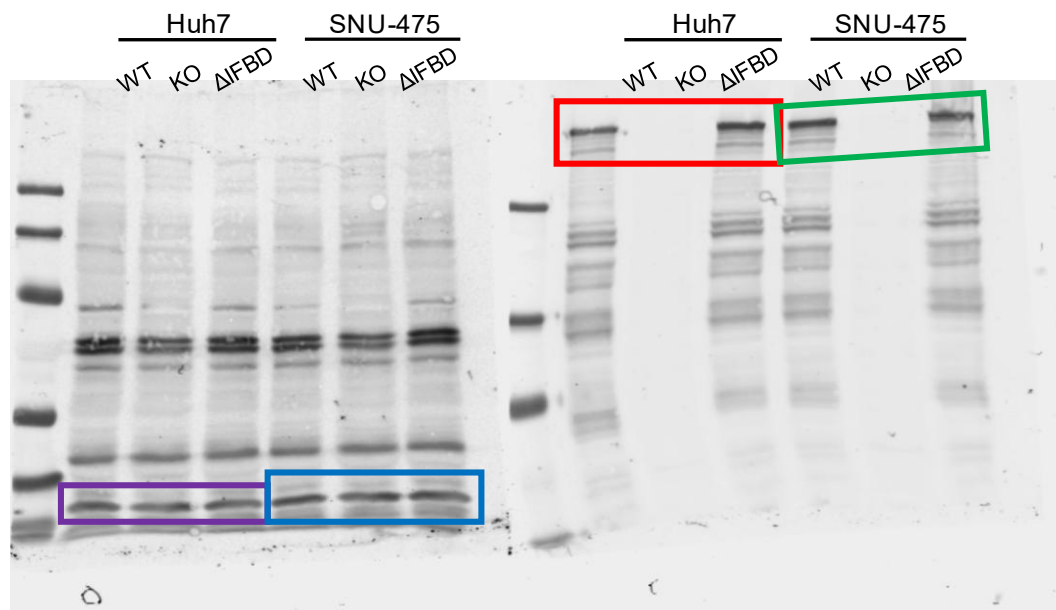

Supplement: fig2-figsupp1-data1 [file elife-102205-fig2-figsupp1-data1-v1.pdf]
