# Supplementary material for: Plectin-mediated cytoskeletal crosstalk as a target for inhibition of hepatocellular carcinoma growth and metastasis
Source: eLife journal article supplement (doi:10.7554/elife.102205), 2024-10-16

Figure 5 – figure supplement 1C

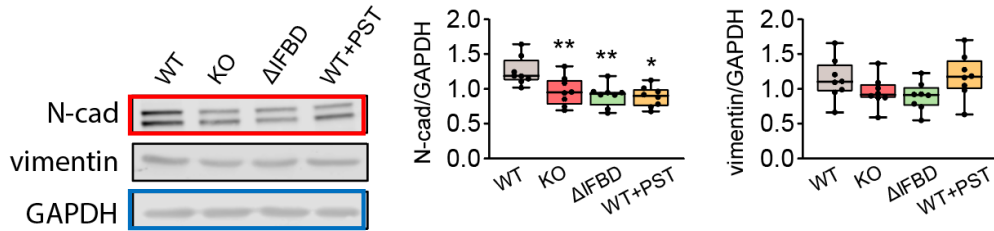

replicate 1-4 (240126)

Ponceau

Raw merged Odyssey

One channel (700) Odyssey

One channel (800) Odyssey

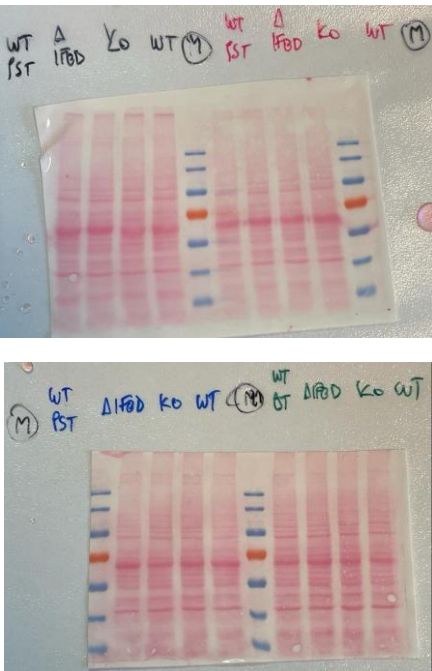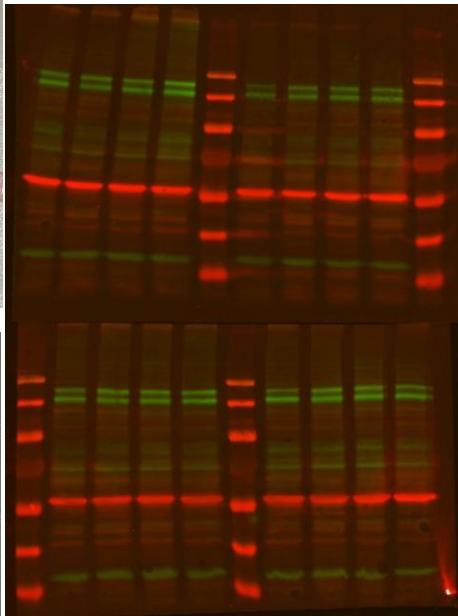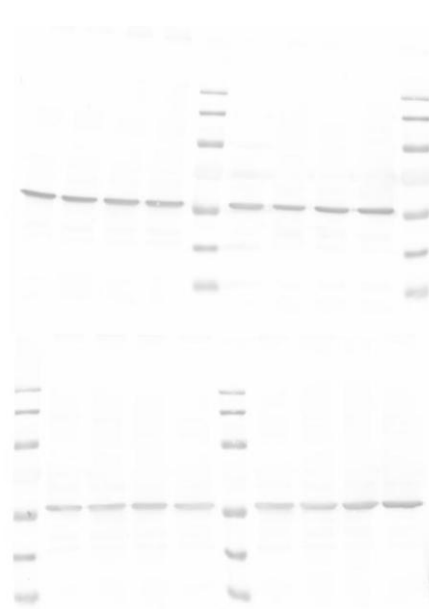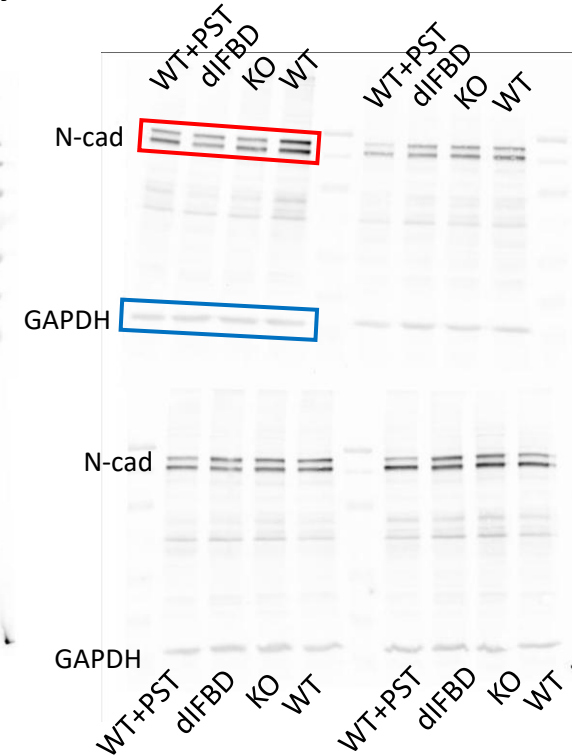

# Ponceau

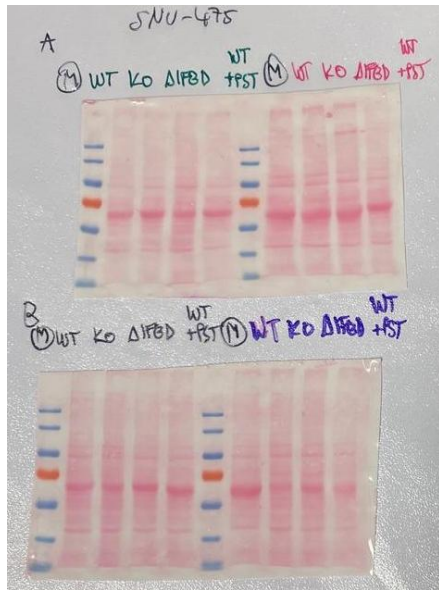

# replicate 5-8 (240201)

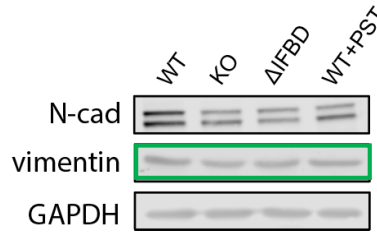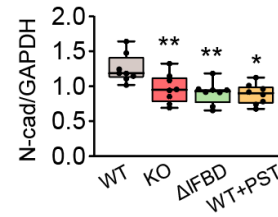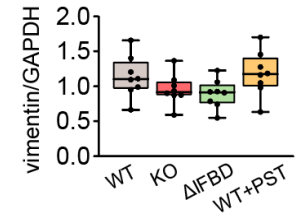

# Raw merged Odyssey

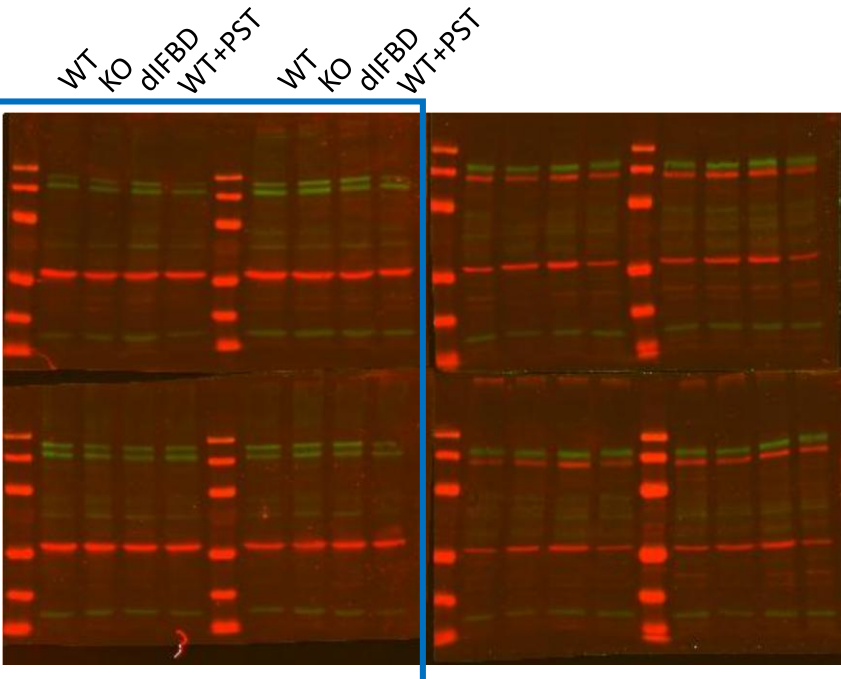

# One channel (700) Odyssey

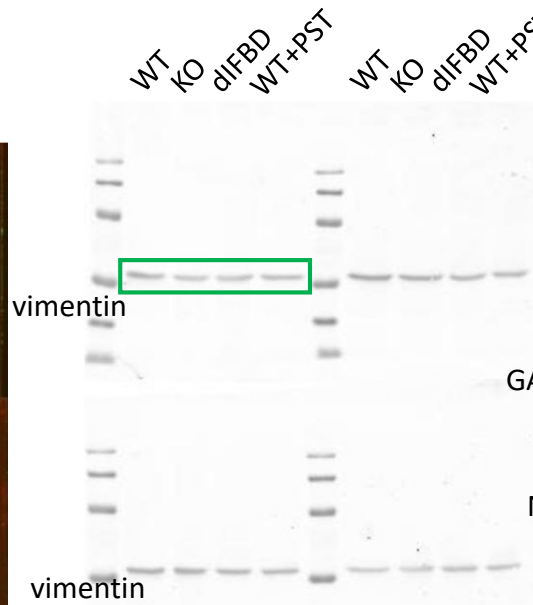

# One channel (800) Odyssey

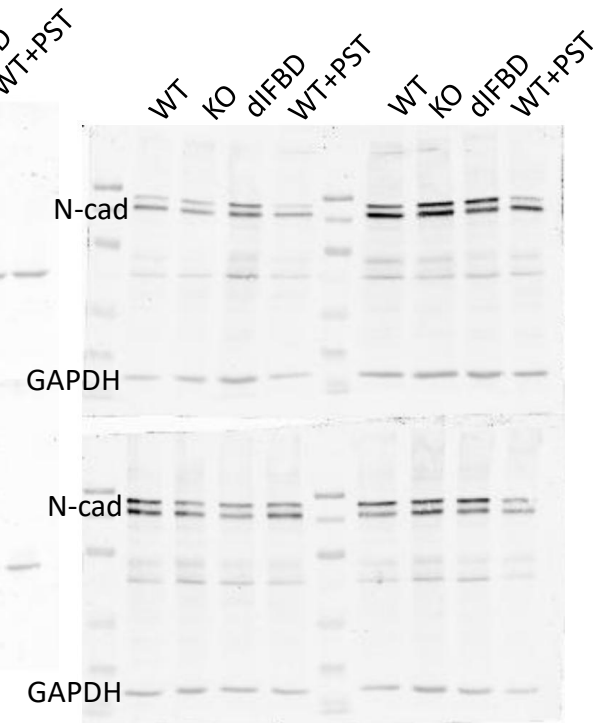

Supplement: fig5-figsupp1-data1 [file elife-102205-fig5-figsupp1-data1-v1.pdf]
